# Supplementary material
Source: PubMed Central journal article supplement (PMC3067474)
Supplement: supp_10_3_363__1.pdf [file supp_10_3_363__1.pdf]

**Supplementary Information to:**

**A functional study of genes essential for autogamy and nuclear reorganization in *Paramecium***

Jacek K. Nowak et al.

## SUPPLEMENTARY MATERIALS AND METHODS

### Spotting and hybridization of dedicated Megabase DNA microarrays

PCR fragments (100ng/ $\mu$ L) were spotted on Corning Gaps II slides, according to (21), with the Genetac G3 arrayer (Genomic Solutions). Quality control was performed before and after spotting by scanning each slide with an Axon 4000B scanner and slides with excessive autofluorescence were discarded.

cDNAs from *P. tetraurelia* d4-2 at different stages of autogamy (Figure S1) were synthesized and indirectly labeled by Cy3- or Cy5-dye coupling using the Fairplay Microarray Labeling Kit (Stratagene). As a tentative hybridization reference, *Eco*RI-digested total genomic DNA from the same strain was indirectly labeled with a 1:4 mixture of dTTP and amino allyl-dUTP (AA-dUTP; GE Healthcare), using the Prime-a-gene Labeling kit (Promega). Cy5- or Cy3-dye coupling was carried out with the Fairplay Microarray Labeling Kit (Stratagene).

Hybridization was performed using the Genetac Hybstation (Genomic solutions) or manually at 42°C in Denhardt Solution containing 70% formamide and 0.7% SDS. Slides were submitted to 3 successive washes (2X SSC 0.1% SDS / 0.5X SSC 0.1% SDS / 0.1X SSC, respectively) before scanning. Three technical replicates were performed for each RNA preparation: two with Cy3-labeled cDNAs and one dye-swap with Cy5 (GEO submission #GSE12988).

### Image acquisition and processing

Hybridized slides were scanned using a GenePix 4000B scanner equipped with a laser to excite Cy3 and Cy5 (10  $\mu$ m resolution, 100% laser power and AutoPMT). The resulting 16-bit images were analyzed using GenePix Pro 6.0® software. Raw data overview and pre-processing were performed using MAnGO software (16), before morphological background subtraction. The signals obtained by hybridization of total genomic DNA were very heterogeneous among the arrays and, therefore, were not used as an inter-array reference. Instead, single-color normalization was performed using the `normalizeQuantiles` function of the R `limma` package (5) (see `GSE12988_rawdatatrieparID.xls` file submitted to GEO). For each array, we calculated the arithmetic mean of normalized signals for all spots corresponding to a given probe (GEO submission #GSE12988). For further statistical analysis, individual normalized signals (3-6 spots per array and 3 replicate arrays) were averaged for each time-point, leading to a mean profile for each probe throughout the time-course experiment. K-means clustering (11) with 20 groups was computed from all mean profiles, by using  $1-r^2$  (where  $r$  is the Pearson correlation) as a similarity measure and a centroid-based search as a cluster initialization method (Table S1). Among the 20 groups of probes obtained following K-means clustering, some showed similar profiles and were pooled into four expression clusters. (Figure 1A). Within each cluster, probes with the largest induction or repression factors were selected by applying the following filters:  $T0/TV > 2$  for cluster I (30 probes),  $T11/TV > 2$  for cluster II (23 probes),  $T20/TV > 2$  for cluster III (20 probes) and  $T0/TV < 0.5$  for cluster IV (31 probes).

### Silencing constructs

All RNAi plasmids are derivatives of vector L4440 (26) and carry a target gene fragment inserted between two convergent T7 promoters (Megabase inserts used in this study are listed in Table S6). Control RNAi plasmids were p0ND7c (8) and pICL7a (9), which target non essential *ND7* and *ICL7a* genes, respectively.

### **GFP fusion constructs**

Plasmid p344-GFP encoding a C-terminal GFP fusion to Ptmb344p was obtained in two steps. First, a 2627-bp fragment containing the whole *PTMB.344c* coding sequence with its upstream 96 bp and downstream 121 bp (bp 695245-692938 from accession number CR548612) was cloned into pCRScriptAmpSK+ vector (Stratagene). Then, the EGFP coding sequence optimized for *Paramecium* codon usage (18) was inserted into a *HpaI* site near the 3'-end of the gene (between codons encoding L769 and T770).

For the construction of plasmid p220-GFP5' encoding an N-terminal GFP fusion to Ptmb.220p, a 5153-bp fragment carrying the whole *PTMB.220* coding sequence with its upstream 527 bp and downstream 182 bp (bp 483140-488292 from gene accession number CR548612) was cloned into pCRScriptAmpSK+. Then, the EGFP coding sequence was inserted into an *AflIII* site near the 5'-end of the gene (between codons encoding Q14 and V15).

Plasmid p170-ZCΔRIX encoding an N-terminal GFP fusion to Ptmb.170p was constructed by inserting a 4800-bp fragment containing the *PTMB.170c* open reading frame and its potential 251-bp terminator region (bp 368611- 363812 from accession number CR548612) between the *BamHI* and *PstI* sites of plasmid pZCΔRIX (kindly provided by E. Meyer & S. Malinsky), directly downstream of the GFP coding sequence expressed under the control of the constitutive promoter of *P. primaurelia* surface antigen *G<sup>156</sup>* gene (bp 1-290 from accession number X03882).

Before microinjection, all plasmids were purified using a QIAfilter Plasmid Maxi Kit (Qiagen) and linearized within the vector sequence with *XmnI* (p344-GFP), *ScaI* (p220-GFP5') or *BglII* (p170-ZCΔRIX). They were filtered through a 0.22 μm Ultrafree-MC filter (Millipore), precipitated with ethanol and dissolved in filtered water to a final concentration of 5 μg/μL. All plasmid sequences are available upon request.

## LIST OF SUPPLEMENTARY FIGURES

**Figure S1. Autogamy time-course of strain d4-2** (*see legend below figure*)

**Figure S2. Biological replicates of the autogamy time-course in strain 51** (*see legend below figure*)

**Figure S3. Northern blot analysis of full-size mRNA in cells submitted to RNAi and control cultures** (*see legend below figure*)

**Figure S4. Protargol-staining of *PTMB.08c*-silenced cells** (*see legend below figure*)

**Figure S5. Multiple alignment of Ptmb.422p with proteins sharing similar Guanylate-Binding Protein (GBP) domains**

Sequences were aligned using ClustalW (7, 14) with default parameters. Alignment was colored using Boxshade at [http://www.ch.embnet.org/software/BOX\\_form.html](http://www.ch.embnet.org/software/BOX_form.html) (grey: similar residues; black: identical residues; fraction of aligned residues that must agree for shading: 0.4).

Consensus sequences of the G-domain motifs are based on motifs found for GBP proteins (19) and structural annotations are based on the structure of human Guanylate Binding Protein-1 (PDB accession code 1F5N, see (20)).

Abbreviations and accession numbers of all sequences are as follows:

Tt: *Tetrahymena thermophila* TTHERM\_01211770 - XP\_001018996, TTHERM\_00657240 - XP\_001024024

At: *Arabidopsis thaliana* AT5G46070 - NP\_199419

Hs: *Homo sapiens* GBP1 - NP\_002044, GBP3 - NP\_060754, GBP5 - NP\_443174 and GBP4 - NP\_443173

Mm: *Mus musculus* GBP2 - NP\_034390

Dr: *Danio rerio* LOC570622- XP\_699217

Dd: *Dictyostelium discoideum* DDB0235201 - XP\_640552

**Figure S6. Alignment of Cks proteins from *P. tetraurelia* and other organisms**

Sequences were aligned using ClustalW and colored using Boxshade (fraction of aligned residues that must agree for shading: 0.5).

The different structural motifs and important residues are marked according to their annotation in (6): orange – residues interacting with CDK2; blue – residues from the anion binding site. Positions of  $\beta$  strands and  $\alpha$  helices are indicated.

Abbreviations and accession numbers are as follows:

Ce: *Caenorhabditis elegans* Cks-1 - NP\_501457, Cks-2 - NP\_490896

At: *Arabidopsis thaliana* CKS1 - NP\_180363, CKS2 - NP\_180364

Hs: *Homo sapiens* CKS1B - NP\_001817, CKS2 - NP\_001818

Dm: *Drosophila melanogaster* Cks30A - NP\_476947, Cks85A - NP\_649817

Sc: *Saccharomyces cerevisiae* Cks1 - NP\_009693

Sp: *Schizosaccharomyces pombe* suc1 - NP\_595431

**Figure S7. Multiple alignment of Ptmb.344p and Msh2 proteins from different species**

Sequences were aligned using ClustalW and colored using Boxshade (fraction of aligned residues that must agree for shading: 0.5). All structural annotations are based on the structure of *E. coli* MutS protein (PDB accession code 1E3M\_A, see (13)).

Abbreviations and accession numbers are as follows:

At: *Arabidopsis thaliana* - NP\_566804  
Zm: *Zea mays* - Q9XGC9  
Hs: *Homo sapiens* - NP\_000242  
Dr: *Danio rerio* - NP\_998689  
Dm: *Drosophila melanogaster*: - NP\_523565  
Ce: *Caenorhabditis elegans* - NP\_491202  
Mg: *Magnaporthe grisea* - XP\_368365  
Nc: *Neurospora crassa* - XP\_959643  
Sc: *Saccharomyces cerevisiae* - NP\_014551  
Dd: *Dictyostelium discoideum* - XP\_643399  
Tb: *Trypanosoma brucei* - XP\_823311  
Tc: *Trypanosoma cruzi* - XP\_819877  
Pf: *Plasmodium falciparum* - XP\_001348428  
Py: *Plasmodium yoelii yoelii* - XP\_728672  
Tt: *Tetrahymena thermophila* - XP\_001013224  
Pt: *Paramecium tetraurelia* – PTMB.344c

**Figure S8. Immunolabeling of *PTMB.170c*-silenced autogamous cells with anti- $\gamma$  tubulin antibodies** (see legend below figure)

**Figure S9. Alignment of the helicase domain of Ptmb.220p with other similar DExH-box helicases**

Full protein sequences were aligned using T-Coffee (17) with default parameters. The alignment was colored using Boxshade (fraction of aligned residues that must agree for shading: 0.3). Only the region encompassing the helicase domain is shown, since N and C-terminal parts of the proteins did not give significant alignment.

Structural annotation is based on the structure of *Bacillus caldotenax* UvrB protein (PDB accession code 1D9Z\_A, see (25)).

Consensus amino acid sequence of the 8 helicase motifs constituting the helicase domain of DEAH family genes based on (24).

Abbreviations and accession numbers are as follows:

Tt: *Tetrahymena thermophila* Ema1p - BAF49175  
Eh: *Entamoeba histolytica* EHI\_090040 - XM\_643619  
At: *Arabidopsis thaliana* NIH- NP\_172152; HVT1 - NP\_850154  
Hs: *Homo sapiens* DHX29 - NP\_061903; DHX57 - NP\_945314; TDRD9 - NP\_694591; RHA - NP\_001348  
Dm: *Drosophila melanogaster* CG1582 - NP\_572663

## LIST OF SUPPLEMENTARY TABLES

### **Table S1 (*Excel file*). K-means clustering of Megabase microarray data**

All probes spotted on customized plates are listed in the first column (GEO submission # GPL7296). Mean values of the normalized hybridization signals obtained for each time-point are displayed in the following four columns (linear values). Probes are ordered according to their K-means group (last column).

### **Tables S2-S5 (*Excel file*). Lists of probes in clusters I to IV and human curated annotation of corresponding genes**

For each gene shown on these tables, expert human curation of gene models was performed using the Apollo software (15) for scaffold\_1, which corresponds to the Genoscope assembly of the Megabase chromosome (2). PTMB numbers refer to Megabase accession numbers (27), GSPATG to Genoscope automatic annotation and PTETG to human curated gene models that can be found in the ParameciumDB database at the following URL: <http://paramecium.cgm.cnrs-gif.fr/> (1).

Statistical validation of individual gene expression profiles was performed using whole-genome microarrays as described in the legend to Tables S7-S10. The genes covered by the Megabase microarray probes, that followed the characteristic expression patterns identified for each cluster, are indicated by a « + » symbol in the last column of Tables S2-S5.

### **Table S6. Northern blot hybridization probes and feeding inserts used in this study**

### **Tables S7-S10 (*Excel file*). Statistical analysis of expression profiles on NimbleGen microarrays for genes included in clusters I to IV**

Whole-genome oligonucleotide microarrays were designed and hybridized at NimbleGen, with six 50-mer oligonucleotide probes for each gene (GEO submission # GPL7221; Arnaiz et al. submitted). cDNAs were prepared from two independent autogamy time-course experiments performed with 51 (Figures S2B and C). Raw signals from the 12 hybridizations (6 for each biological replicate) were normalized simultaneously using the `normalizeBetweenArrays` function from the Limma package (23) (GEO submission # GSE17998). For each microarray, the expression level of each gene was taken as the median of the normalized signals obtained for its 6 individual probes. Mean expression levels (mV, mS, m0, m5, m11 and m20) are log<sub>2</sub> values corresponding to the mean of the two replicates for each time-point.

To compare changes in expression level between time-points, the difference between mean expression levels was calculated to give log<sub>2</sub>FC. Statistical significance of changes in expression level was estimated using linear modeling and empirical Bayes statistics implemented in the `lmFit` and `eBayes` functions from the Limma package (22). To minimize the detection of false positives, adjusted p-values were computed after correction for multiple testing using the Benjamini and Hochberg method (3).

### **Table S11. Ohnologs and other paralogs of silenced genes**

Ohnologs resulting from the known WGDs were identified using the data available in ParameciumDB. Other paralogs were found by Blastp searches and proteins showing amino acid identity higher than 40% are indicated.

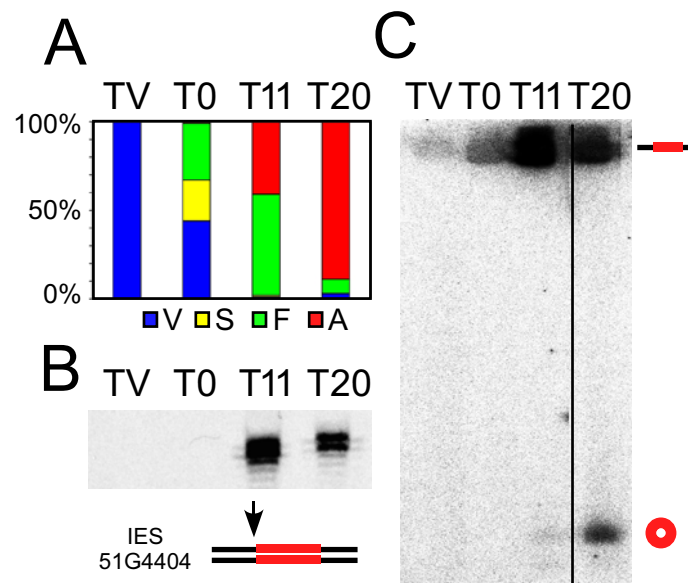

### Figure S1. Autogamy time-course of strain d4-2

**A.** Histograms showing the progression of autogamy during starvation of d4-2. For each time-point (TV: vegetative culture; T0: 50% of cells with fragmented MAC; T11 and T20: 11 and 20 hours following T0, respectively), cells were stained with DAPI to visualize old and new MACs. V: vegetative parental MAC; S: skein formation; F: fragmented old MAC but no detectable developing new MACs; A: fragmented old MAC + 2 visible anlagen.

**B.** Double-strand break detection at the left end of IES 51G4404 by LMPCR. Experimental details can be found in (10).

**C.** Detection of circular excised IES 51G4404 molecules by Southern blot hybridization of total genomic DNA. Experimental procedure was described in (4).

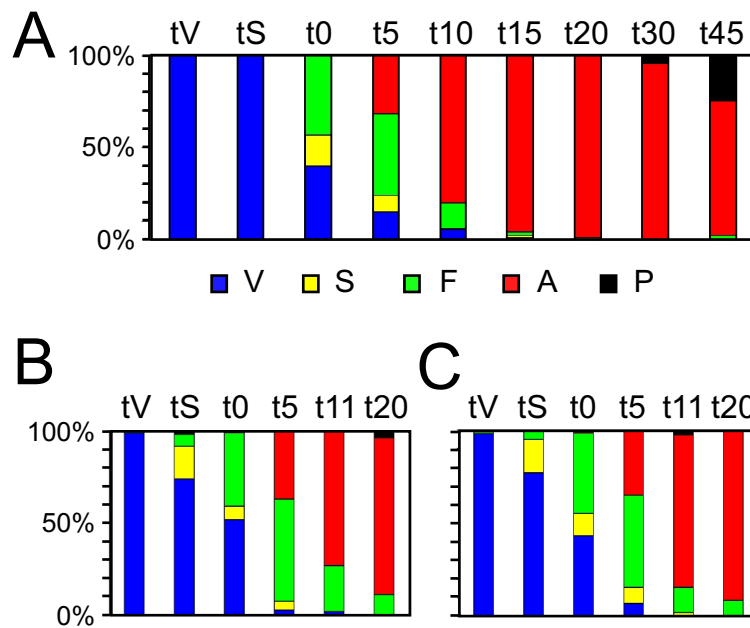

### Figure S2. Biological replicates of the autogamy time-course in strain 51

A. Progression of autogamy in the culture of 51 mt8 used for the Northern blot analysis of mRNAs shown in Figure 1.

B and C. Progression of autogamy in two independent cultures of 51 mt8 used in NimbleGen microarray experiments.

Indicated time-points: tV for vegetative cultures ; tS for starved or meiotic cells with intact parental MAC; t0 for 50% of cells with fragmented MAC; the following time-points refer to hours following t0.

At each time-point, cells were stained with DAPI to monitor autogamy stages. The color code is the same as in Figure S1 for V, S, F and A. P: post-karyonidal division (1 anlagen + fragmented old MAC).



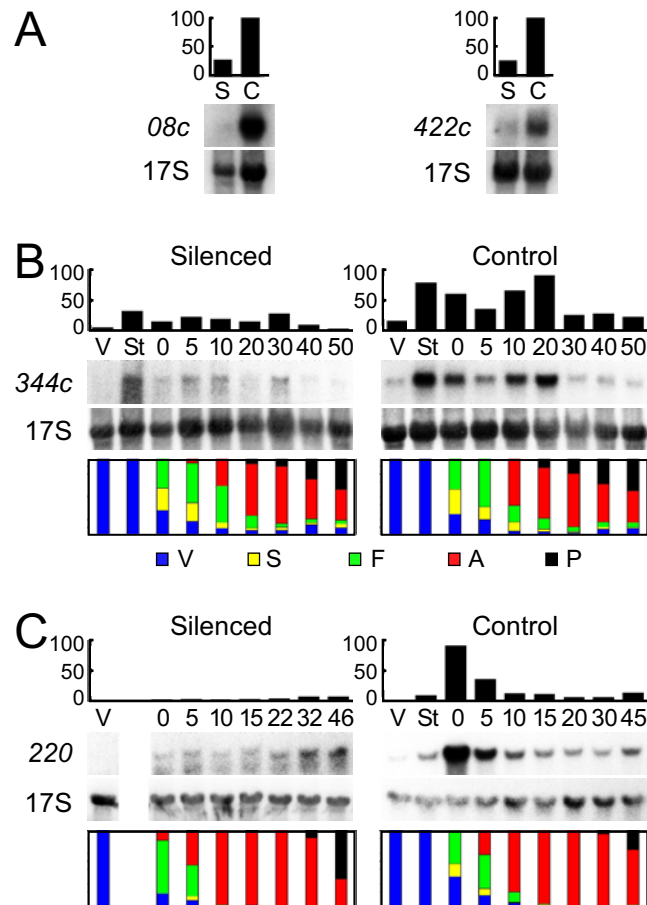

**Figure S3. Northern blot analysis of full-size mRNA in cells submitted to RNAi and control cultures**

**A.** Analysis of total RNA extracted from vegetative cells following 26-30 hours of incubation in *PTMB.08c* (left panel) or *PTMB.422c* (right) silencing medium (S). Control RNAi (C) was against *ND7* gene. Hybridization probes are indicated on the left of each panel. Normalized amounts of each mRNA relative to 17S rRNA are shown on top, with an arbitrary unit for vertical axis

**B.** Autogamy time-course of *PTMB.344c* (Silenced) and *ND7* (Control) silenced cells. Northern blots of total RNA were hybridized successively with a *PTM344c* probe and a 17S rDNA probe. Normalized amounts of *PTMB344c* mRNA are shown on top. V: vegetative cells; St: starved cells; following time-points are in hours. Histograms at the bottom represent the progression of autogamy in the cultures (same color code as in Figure S2).

**C.** Autogamy time-course of *PTMB.220* silenced cells (left). Control time-course (right) was performed with a culture grown in standard *K. pneumoniae* medium (see Figure S2A).

In all panels, the signal corresponding to full-length mRNA was normalized relative to 17S rRNA signal (histograms on top of each panel). The silencing of *PTMB.186* could not be checked by northern blot hybridization because the whole coding sequence was inserted into the RNAi plasmid and bacterial RNA gave a strong hybridization signal when probed with a *PTMB.186* fragment. *PTMB.170* silencing was not quantified either, due to the very low transcription level detected in wild-type cells.

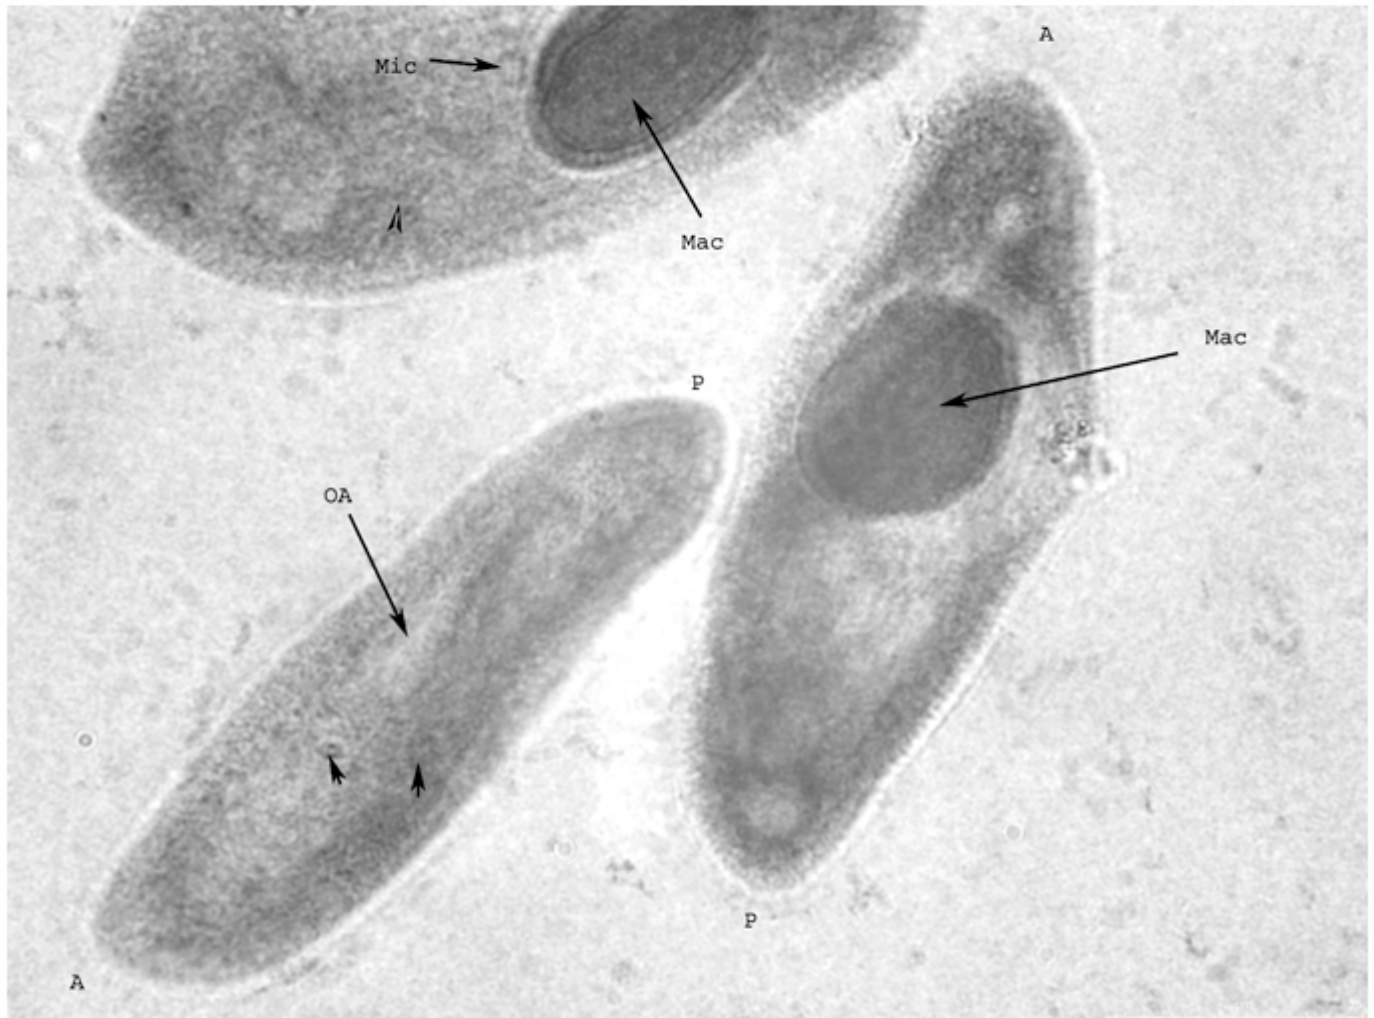

**Figure S4. Protargol-staining of *PTMB.08c*-silenced cells**

After 10 hours of incubation in *PTMB.08c*-silencing medium, 41 cells were fixed and stained with Protargol protein-staining reagent to document the loss of DNA and the absence of the whole macronuclear structure. 27% of cells were small and did not have any visible nuclei, 20% harbored remnants of nuclei in the form of few dispersed dots (see bottom left cell on the picture) and 53% exhibited apparently normal MACs (top and right cells).

Unannotated arrows point at some small nuclear structures, most probably corresponding to the small dots visible in DAPI-stained cells (see Figure 2 panels a-a'). OA: oral apparatus; A: anterior, P: posterior.

```

PTMB.422 1 -----MKEEATLITYPDQNRTYNIAEEAAKMRISINNP--TATISVAGL
GSPATG00012059001 1 -----MKKSTREEAMPLIFYSQETQTYOVNPDATETIKNIPSP--IGTVGVAGM
GSPATG00013523001 1 -----MKKSTKEEAMPLIFYQETQTYOVNPDATETIKNIPSP--IGTVGVAGM
THERM_01211770_Tt 1 -----MSSAREEAIFFTYNSQRKYLCEAVQIKQVQPK--IGTVSVAGA
THERM_00657240_Tt 1 -----MSKKGQREEAITLVSNFNSQOCYQINDEAIDFTQSVQPK--IGVVGAGM
AT5G46070 At 1 MRSFFGRGKDPSPASPSRSPSTSPASSAVTGPPRIRLVYCEKGRFRMDPEAVATHQLVKEP--IGVSVQGR
GBP1 Hs 1 -----MASETHMTGPMCLIENTNG-ELMANPEALKILSAITQP--VVVVAIVGL
GBP3 Hs 1 -----MAPEHMTGPMCLIENTNG-ELVANPEALKILSAITQP--VVVVAIVGL
GBP2 Mm 1 -----MASETHMSEPCLIENTEA-OLVINDEALRIISAITQP--VVVVAIVGL
GBP5_Hs 1 -----MALETHMSDPMCLIENTFNE-OLKVNQEALEILSAITQP--VVVVAIVGL
GBP4 Hs 1 -----MGERTLHAAVPTPGYPESESIMMAPCLVENQEE-QLTVNSKALEILDKIQP--VVVVAIVGL
LOC570622 Dr 1 -----MAFGRHMSAPVCLIENTDFGKLCVKKREAKDILDEINEP--VVVSVVGL
DDB0235201 Dd 1 --MKLKNIFLLFIYILVSISSQPPQQQQQNFIELFKPVQLIYPD--SNHDLRIITNESSINILNSVLSSEDRSVLGVVGT
                                                                                               G1 box GX
    
```

```

PTMB.422 45 YRTGKSYLLNRIVLNRSNGFGVGPVTVNPTCKGMWVWGTPIITVG----KTSILIVDSEGTGAINDSVNHDRIFALAVL
GSPATG00012059001 48 YRTGKSYLLNRMILLNRSDFGFGVGPVTVNPTCKGLWMMGKPLLQTSDEGSCSILVVDSEGLGAP-DESDTHDIRIFSLTTL
GSPATG00013523001 48 YRTGKSYLLNRMILLNRSDFGFGVGPVTVNPTCKGLWMMGKPLLQTSDEGSCSILVVDSEGLGAP-DESDTHDIRIFSLTTL
THERM_01211770_Tt 48 YRTGKSYLLNRMILLNRSDFGFGVGPVTVNPTCKGIWVWGTPIKGTPEGDPVNVLLIMDESEGIGST-DESDTHDIRIFSLTTL
THERM_00657240_Tt 50 YRTGKSYLLNQMLLSRSDGFGVGPVTVNPTCKGLWMMGKPLLQNDGETIHLIIDSEGIGAI-DESDTHDSRIFALAVL
AT5G46070 At 79 ARQGSFILLNQLLGRSN-GFVASTVQSHTKGIWVWGTPIKRTALDGETEYNLLLLDSEGIDAY-DQGTSTYSTQIFSLAVL
GBP1 Hs 47 YRTGKSYLMNKLAKGNK-GFSLGSTVQSHTKGIWVWCVPHRKP----GHILVLLDTEGLDVEKGDQNDQSWIFALAVL
GBP3 Hs 47 YRTGKSYLMNKLAKGNK-GFSLGSTVQSHTKGIWVWCVPHRKP----EHTLVLLDTEGLDVEKGDQNDQSWIFLAVL
GBP2 Mm 47 YRTGKSYLMNKLAKGRN-GFSLGSTVQSHTKGIWVWCVPHRKA----GQTLVLLDTEGLEDVEKGDQNDQSWIFALAVL
GBP5_Hs 47 YRTGKSYLMNKLAKGNK-GFVASTVQSHTKGIWVWCVPHNWP----NHTLVLLDTEGLDVEKADNKNDIQIFALAIL
GBP4 Hs 62 YRTGKSYLMNRLAGKRN-GFPLGSTVQSETKGIWVWCVPHLSKP----NHTLVLLDTEGLDVEKSNPKNDQSWIFALAVL
LOC570622 Dr 48 YRTGKSYLMNRLAGKQS-GFALGSTLESKTKGIWVWCVPHVYKK----GHTLVLLDTEGLDVEKDERHDTWIFLAVL
DDB0235201 Dd 79 EHSKSEILLNQLLCTTD-SFTVQPTVHPQTIGIWMWACRIKDDN--GKHVLLLLDTEGFYSS-NVSETYDAKIFALITTL
G1 box XXXGXG      G2 box T      G3 box DXXG
switch 1 #####      #####      switch 2 #####      #####
GBP N-terminal domain
    
```

```

PTMB.422 120 LASSFVYNSVCAIDEGALESLSFVVNLTKFTQLRSNEHPDSE-----EYGFMPQEFW
GSPATG00012059001 127 LTSCFTYNSVGSIDENALQNLISLVNLTKNIQIKSQS-TPLE-----DLSQYFPQYFW
GSPATG00013523001 127 LTSCFTYNSVGSIDENALQNLISLVNLTKNIQIKSQS-POBLE-----DLSQYFPQYFW
THERM_01211770_Tt 127 LANSFTYNSVCAIDENALNQLISLVNLTKNITIKSDGDELQEGIQNQINTYCLFAFLFALIEEYIKKYSKYPSPFW
THERM_00657240_Tt 129 LSSCFYNSVGSIDEAATQNLISLVNLTKNITIKSGQDDELDFE-----DYSQYLPSPFW
AT5G46070 At 157 LSSMFVYNQCGIDEASLDRLSLVTOVTKHIRVKASGGTSSRSE-----LQGFSPPIFW
GBP1 Hs 122 LSSFTYNSVGTINQAMDQLYVYVTELTTHRIRSKSSPDENENEV-----EDSADFVSFFPDPFW
GBP3 Hs 122 LSSFTYNSVGTINQAMDQLYVYVTELTTHRIRSKSSPDENENEV-----EDSADFVSFFPDPFW
GBP2 Mm 122 LSSFTYNSVGTINQAMDQLYHYVTELTDLIRSKSSPD--QSGV-----DSSANFVGFPPDPFW
GBP5_Hs 122 LSSFTYNSVGTINQAMDQLYHYVTELTDLIRSKSSPD--LDRV-----EDSADFVSFFPDPFW
GBP4 Hs 137 LSSSFVYNSVSTINHQAELHYVTELAELIRAKSCER--PDEA-----EDSSEFASFPPDFW
LOC570622 Dr 123 LSSALVYNSLGVIDNMALEKLYHYVTELTENIRVKAEGNE-VDE-----DESSEFMRVFPSPFW
DDB0235201 Dd 155 LSSHLYNSVKIIDQSALEYLELLSRRTQLFALSKSIKSNEMNQEILG-----LNNLNFPSLTW
switch 2 ###
    
```

```

PTMB.422 173 VLRFSLQLLDNNGDTLTSHOYLERSLQEQPFCFDRVBEKNRIRRLIRTFEFPRECFTLVRPNNESQLOQLQYQDLKQL
GSPATG00012059001 181 VVRDFTLQLVDRNNEQITSKDYLENALTIQKASDGIQKKNIRKRLSAFFKDRDCTLVRPITKESLQNLNLEDFKQL
GSPATG00013523001 181 VVRDFTLQLVDRNNEQITSKDYLENALVIQKGSSEGIQKKNIRKRLTTFEKDRDCTLVRPITKESLQNLNLEDFKQL
THERM_01211770_Tt 207 VLRFSLQLVDTTEGDPITSNEYLERALSEQKYSDEVEKSKNRIRRLKTFEQRECFTLVRPITVNEQNLQKLDKMLDQL
THERM_00657240_Tt 184 VVRDFSLQLVDQEGEITSKDYLEKALQPKGFSDOVEQKNRIRRLTTFEKDRDCTLVRPITNEENLQNLQKLDKMLDQL
AT5G46070 At 211 LLRDFVLDLVED-NRRLISPRDYLETALRPVQSGGGDCAKNEIRDSIRALFDFDRECFTLVRPITNEENLQNLQKLDKMLDQL
GBP1 Hs 181 TLRDFSLDLEAD-GQPLTPEDEYLYTSLKLLKCTSQKDETFNLRPLRCIRKFFPKKCFVDFRPHRRK-LAQLEKLQDEEL
GBP3 Hs 179 TLRDFSLDLEAD-GQPLTPEDEYLYSLKLTQCTSQKDNFNLRPLRCIRKFFPKKCFVDFLPHRRK-LAQLEKLQDEEL
GBP2 Mm 179 TLRDFSLDLEVN-GKPVTSDEYLEHSLTLKKGADKTKSFNEFRPLRCIRKFFPKKCFVDFRPAQRKQ-LSKLETLREEL
GBP5_Hs 179 TLRDFSLGLEID-GQLVTPDEYLENSLRPKQSDQRVQNFNLRPLRCIRKFFPKKCFVDFLPAHQK-LAQLETLPPDEL
GBP4 Hs 194 TVRDFTLLEKLD-GNPITEDEYLENALKLIPKKNPKIQNSNMPRECIHFFRKRKCFVDFRPTNDKQYLNHMDVPPENL
LOC570622 Dr 181 AVRDFTLLEKMG-DKPIITSDEYLESAKPKKQNSPOLAQYVLPFRCLREFFAPRKCFVDFRPASTQD-MKRVEDLTFEEL
DDB0235201 Dd 215 VQDFQDLDGDE----TPTQVLLNLLKHAHS----KDKGVSSSLISTDIFPSIECHTLFLPSGDRNITLRHNLKAKSNL
G4 box TLRD
V
    
```

PTMB.422 253 RPEFYEQAISLRKMLFSKVKPKQFR--GKTLTGGMYINLINSYLOAMNSGCVATIESSWYTFREECRKLQABAFETIYEK  
 GSPATG00012059001 261 RPEFYEQVINLRKKILNRIKPKMLN--GKTLTSGQMYCDLKSIVYTAIINGAVPAIESAWTYICKNECQKAVABAFDITYEQ  
 GSPATG00013523001 261 RPEFYEQVINLRKKILNRIKPKMLN--GKTLTSGQMYCDLKSIVYTAIINGAVPAIESAWTYICKNECQKAVABAFDITYEQ  
 TTHERM\_01211770\_Tt 287 RPEFYEQVIQIRKKILQRIKPKNLN--GKILNGEMIMTLCDSYVRAIINGAVNENIENAWTYVCKDECYKASQKAFESYEK  
 TTHERM\_00657240\_Tt 264 RPEFYEQVINLRKSLILCRMKPKQLR--GKILTGEYCDLKSIVYFAIINGAVNENIENAWSYCKNECHKAAQSAIENIDQ  
 AT5G46070\_At 290 RPEFGAGLDAITKFFVEKTRPKQLG--GTVMTGPILVGITQSYLDAIINGAVETITSSWQSVETEERRAYSDSVEAYMA  
 GBP1\_Hs 259 RPEFYQOVADFCYSYIFSNKPKTSLG--GIQVNGPRLKESLVLYVNAISSGDLPCMENAVLALAQIENSAAVQKAIHAYDQ  
 GBP3\_Hs 257 DPEFYQOVADFCYSYIFSNKPKTSLG--GIKVNGPRLKESLVLYVNAISSGDLPCMENAVLALAQIENSAAVQKAIHAYDQ  
 GBP2\_Mm 257 CGEYEQVAEFTSYITSYSSVKTLCG--GILVNGPRLKESLVLYVNAISSGDLPCMEFAVLTLAQIENSAAVQKAIHAYE  
 GBP5\_Hs 257 EPEFYQOVTEFCYSYIFSHSMKTLPG--GIMVNGSRKLNVLVYVNAISSGDLPCMENAVLALAQIENSAAVQKAIHAYDQ  
 GBP4\_Hs 273 ERHFMQSDNFCYSYIFTHAKPKTLRE--GILVTKRKLGLVLYVVDAINSGAVPCLENAVTALAQIENPAAVQRAADHYSQ  
 LOC570622\_Dr 259 DSEFYQOANTEFCYSYIINSTEPKTVKG--GRITGTALGNLAEVYVEAIVRSKGVPCLENAVVSLAKIQVRAVEQALQIYMT  
 DDB0235201\_Dd 286 NEIYKELNELKSTLTKNDNDNGGGGKSKLTGSPSSTLLRLLLEVANGNKHETVPSIWSGFIKQQQSAIEDSIIAKKD

GBP, C-terminal domain

PTMB.422 331 QIKETILS---KLPPTLEEDVKALNICKSKATAAHMGNNAE--IIP---YVNELKQKIKGKFENLLAFNETESMALCKQY  
 GSPATG00012059001 339 ILKENLHN---RFPISNEDLKAFNRSLKEQAFALFKKCKV--GEY--EYFKNELSKRIKRNFAAVKQENDREGSRMCSQF  
 GSPATG00013523001 339 ILKENLHN---RFPISNEDLKAFNRSLKEQAFALFKKCKV--GDA--DEYKLELQRRIKQRFAAVKQENDREGSRMCSQF  
 TTHERM\_01211770\_Tt 365 TIKEMIGS---KIPTINDEIKIAHRTAKEALEIFKKRAI--GDVSKHEHLEBNKMKKARVQIRATNEKESYQEQCNF  
 TTHERM\_00657240\_Tt 342 VLREVLHN---KIPCSLEDLKIYHKMAKESVSIFFKKKAV--GEVSEELYLNEVIKIKQKFNIVROENEREARNCSQF  
 AT5G46070\_At 368 AFDQSKAP---EEG---ALREEHEEAVRKALAIENSNAV--GNG--SARKKFEDLHKDLKFKFELYKKNAFMEADLR  
 GBP1\_Hs 338 QMGQKVL---PTEI--LOELLDLHRVDSERAEIETVTSV--KVDVHLFQKELAAQTEKRRDDFKONQEAASSDRCSAL  
 GBP3\_Hs 336 QMGQKVL---PAET--LOELLDLHRVDSERAEIETVTSV--KVDVHLFQKELAAQTEKRRDDFKONQEAASSDRCSAL  
 GBP2\_Mm 336 QMNQKIQM---PTEI--LOELLDLHRPIESEAEIETVTSV--KVDVQKQFQELGNLIVAKRDFAIKKMDVSSARCSAL  
 GBP5\_Hs 336 QMGQKVL---PMEI--LOELLDLHRVDSERAEIETVTSV--KVDVQSFQKELVTLDAKQNDICRNLEASSDYCSAL  
 GBP4\_Hs 352 QMAQQRIL---PTDI--LOELLDVHAACEREAIAVMEHSF--KDNHEFQKRLVDTTEKKKGFDFLQNEEASAKYQAE  
 LOC570622\_Dr 338 EMLSMACF---PLD--PEELSSIHTELAEKRAIEEINMSF--SDNMQIYQOELMGKIHNEYODLCOQNHQASLMQCOEV  
 DDB0235201\_Dd 366 KMSITNEDSFSKPLCLLKEFEKLESQSNNYATNLKQLLEGLEEAYIPGQKLERLSDNHQYFLKENYFKIQNYQRI

PTMB.422 402 IVQQTAPIDQKLMSEYKTYSEFEKDKLFLNIFLDEHGPKVVKRQKLFVEFIQKMTTEGATFVQNIQQDFEGYKKSFE  
 GSPATG00012059001 412 IQQEFQPIDRKLKLGBYRSFGEYKDKIMFYFFFIENGPVGTNRNQIILEFLQRALLEGSNLFIROYSQETMMKNVAQE  
 GSPATG00013523001 412 IQQEFQPIDRKLKMGYKSFGEYKDKIMFYFFFIENGPVGTNRNQIILEFLQRALLEGSNLFIROYSQETMMKNVAQE  
 TTHERM\_01211770\_Tt 439 INREFATIDRKLKSNQYKRFSDFESDIKLFYSFLVNHGPIIVNRRNVIFFLEFLQRSINEAANFVKNLEQEVDIQRSCNSE  
 TTHERM\_00657240\_Tt 416 IQQEFQSIERKLKMNBYKKNYPYEQDKLFLNYFMENGPKVTVNRQQFVSDFLHRATSDGAQYFQKFSHEQDIQKTLSEQ  
 AT5G46070\_At 436 CTSTIQRMKQLRACHASNANMNVVVKVLEARLAEYEAASCHGP-----  
 GBP1\_Hs 411 LQVIFSPLEEEVVKAGIYSKPGGYRLEFQKLDLKKKYEEPRKQ-----  
 GBP3\_Hs 409 LQVIFSPLEEEVVKAGIYSKPGGYCLEFQKLDLLEKRYEPRKQ-----  
 GBP2\_Mm 409 LEDIFGPLEEEVVKLGTFSKPGGYLEFQMRQBLEKKNQAPKQK-----  
 GBP5\_Hs 409 LKDIIFGPLEEEVVKQGIYSKPGGHNLEFQKTEELKAKYREPRKQ-----  
 GBP4\_Hs 425 LKRLSEHLTESILRGLHSVPGGHNLYEKKQOEWYKLVPRKQ-----  
 LOC570622\_Dr 410 LEDVDFLEMNINSNSYLRPGGYREYRALLAQITSSYRARTISQ-----  
 DDB0235201\_Dd 446 YNEMIESFENQLESIKIPISSKHFNHQTSILKNEINQYKEITK-----

PTMB.422 482 QINKLQNGLNTIKLDSQKQVEQQNQIKQINQONTETIQYKTCQDELEKCLKQKNTOSTQOMKTOFENDFNKIQTSFEEL  
 GSPATG00012059001 492 TQKKLELELKEARQDGLKDKNNILMKLAQIESEKTEIETREQVARDNLEELKIQKQOVERDLKLESENEKNEMLRQIQEL  
 GSPATG00013523001 492 TQKKLELELKEARQDGLKDKNNILMKLAQIESEKSDLELREQVARDNLEELKIQKQOVERDLKLESENEKIELTRQIQEL  
 TTHERM\_01211770\_Tt 519 VQRNRETVELRKKTDNERNLHREVEQLKEKDSIATDKVKNERAVKETEHEKQMEKEVEKLLNSERVELINDQINNL  
 TTHERM\_00657240\_Tt 496 VQKKLEFELQELKQRMHSEINNYEIKKSQLEFEKTEIEMREQVLRENDAIKVKSEKKEIYEYFKEQATSEKOEQKVIINDQ  
 AT5G46070\_At 480 -----GKWQKLSVFLQOSSLGPIYDITKRLIDSIATEKNSLAMKFFS-VEDAMKHLKQQLDSDS  
 GBP1\_Hs 455 -----IQAEELQTVLKSKESSMTDALLODQTLTEKEKEVEVERVKAESAQASAKMLQEMQK  
 GBP3\_Hs 453 -----IQAEELQTVLKSKESSMTDALLODQTLTEKEKEVEVERVKAESAQASAKMLQEMQK  
 GBP2\_Mm 453 -----IQAEELQTVLKSKESSMTDALLODQTLTEKEKEVEVERVKAESAQASAKMLQEMQK  
 GBP5\_Hs 453 -----IQAEELQTVLKSKESSMTDALLODQTLTEKEKEVEVERVKAESAQASAKMLQEMQK  
 GBP4\_Hs 469 -----VKAENEVLQNFLOSQVVEVSEILOSQKALTAGAKAAERAMKAAEKEQELLREKQK  
 LOC570622\_Dr 454 -----IMSEVLCMELKGEIVGNNILOADESLSAEEQKEVQMLKNEILQQRQGLBEEQNL  
 DDB0235201\_Dd 490 -----QYNLNRNQNNYFEIFLNSLEKDIERLINGKQIQNRNEIETLLTKSIDMISERYKS

PTMB.422 562 KQKQTAEEALKSAEREQFIIQSESKKEALLEQKISHLOKLNDEFNKKEQIDSSIMTSKSEFSVKLRELITASYEQTIS  
 GSPATG00012059001 572 KQOVLKAEEFNKDLERTTLFGNSEFEKERALLEQKIFFEKLIVNEMNAKEIDVONEIKNLRKBYSLQSKDQOSKADQSVR  
 GSPATG00013523001 572 KQOVLKAEEFNKDMERTTLFGNSEFEKERALLEQKIFFEKLIVNEMNAKEIDVONEIKNLRKBYSLQSKDQOQKSDQVVR  
 TTHERM\_01211770\_Tt 599 RNKSKITEETLKKVERELLKESSEKQKALLEQRAQHFEKICEEYLAQKDATENMQSTHSGFNTOQMKQEQKYERTIK  
 TTHERM\_00657240\_Tt 576 KQKLIHQEEMSELERNKILSSEFEKKEKALLTORIQFYEQKQMEELSKKDKDQSDNIDKSLKKEYNQSIQKDISNKYESLNK  
 AT5G46070\_At 537 ERYKLYQKRYDESNNDKKLEDIYRERITKIQGENSSLNERCSTLVKTVESKKEEKIWEIYNQDQVVKQKAVQEQQLSS  
 GBP1\_Hs 513 NEQMMQKERSYQEHKQLTEKVENDRVQLKEQERTIALKIQEQEQQLKEGFOKESIMKNEIOTDQTKMRRKACITIS  
 GBP3\_Hs 511 YQMMMEKEKSYQEHVQQLTEKMEREAQLELEQEKLTISLCEEQARVLKRCQGESTOLQNEIQKQKTKKTKRYMS  
 GBP2\_Mm 511 FELMMQKESYQEHVKKLTEKMKDEQKQLAEQENIQAARQEQKFLKEGFENESKKLIREIDTQKONKSSGK-CTIL  
 GBP5\_Hs 511 NEQMMQERERLQEQVVR---QMEIAKQNWLAEQQKMQEQQEQEQAAQLSTTFOAQNSLSELOHAQRTVNNDDPCVIL  
 GBP4\_Hs 512 QQMMMAQERSFOEYMAQMEKLEEBERENLREHERLKHKLKQVEMLKEBFQKKSQELNKEINOKEKIESTKNEQUR  
 LOC570622\_Dr 527 QEQAFKDMERTQEHVQQLTEKMERERQIRIRDNERVLEAKLKEREALLKQGEHEEASRMQKEINSKTDMSQOESKPS  
 DDB0235201\_Dd 547 YMNQLLPLTTEQLKNEKDKHYNQLLNSKFKQITEVAHEESYQPFKSMABKQLHQFOYFOEINEQKILEKSKFESDQS

PTMB.422 642 EVRAQNQLNEKIQEITSDQLVLEIKYENYQVQTAKKEESQSNAIKKLMQSQQTLQEQINIITKKNQLQDDLLSTQMQV  
 GSPATG00012059001 652 QLQOKLNDMOKLNEVENELVEKETNFENDKFKFEKERSLTKQNLEQNEQIQALTRELRBYRNEEQVQLMLKNDANN  
 GSPATG00013523001 652 QLQOKLSDLOEKLINEVENELVEKESNFENDKFKFEKERSLTKQNLEQNEQIQALTRELRBYRNEEQMQQMLKSDANN  
 TTHERM\_01211770\_Tt 679 ELENKLTNLEKESNFEENEKSNQSNFSQEVETLQTRERGLRQIEELOTEISSTKKQLSFASTNGLKNLGLDKEQFNN  
 TTHERM\_00657240\_Tt 656 SLTQKLNELQERITYELENELTNRQQKEDSEKRRKWEVNNNSRLLLEESQLQIQKLQNEIRDLRNYEEQHAQFLQNDMSK  
 AT5G46070\_At 617 EMEVLRTRSTSEARVAAAREQAQSAAEETKEWKRNYDYAVGEARSALOKAASVQE-----RSGKETQLREDALEEFESI  
 GBP1\_Hs 593 -----  
 GBP3\_Hs 591 HK-LK-----  
 GBP2\_Mm 590 -----  
 GBP5\_Hs 587 -----  
 GBP4\_Hs 607 LT-KITDMASNIMIVTLPGAS-KLLGVGTKLGSRI-----  
 LOC570622\_Dr 592 TMRKVLDTGIGTAATLFLPGFIPKAAGIGLSLSRLF-----  
 DDB0235201\_Dd 627 LTDFKKSVSIIPIIEESLWIKSMNEFKIRSINSYIN-----

PTMB.422 722 ESNEVGEQYKQVVKQTEIKLQEQKQIQ---IKSDAILNQQLQFLQMELEEKNTINDLKKSHDSAMLALEQSQNTQNQQQ  
 GSPATG00012059001 731 QVNEVVEKVNLEDLTKSKDDQLKQARSQSEKDKALMQQKMEFMEVQLDEYKQIEENKKSHEAIMKAFENSSNESTYKI  
 GSPATG00013523001 731 QVNEVLEKVGQLEDLTKTKDDQLKQAKSHSEKDKALMQQKMEFMEVQLDEYKQIEENKKSHEAIMKAFENSSNESTYKI  
 TTHERM\_01211770\_Tt 758 ETNDLKIQNTQLQEEESKTLDKHKQDVSELKREALLQQQTEFVRHELDESRSQIVEAKKAHESTLQALEINNMGDE-ES  
 TTHERM\_00657240\_Tt 735 NHTELQEKMVVYEELKEKEDTLINFKNNFQKAKALLOQKTEFLQVQFEESLQOLENKRHEAIMKALESSSLDSSGKL  
 AT5G46070\_At 692 TLANKDEEITEKATKLEKAEQSLTVLRSDLKVAESKLES-----  
 GBP1\_Hs -----  
 GBP3\_Hs -----  
 GBP2\_Mm -----  
 GBP5\_Hs -----  
 GBP4\_Hs -----  
 LOC570622\_Dr -----  
 DDB0235201\_Dd 664 -----

PTMB.422 799 LNKSTIDLKEQHMIETLQAEHTSQQLRKQLQQQLDQLQELQEAEMRGDVFVLEQKKNLQEEELSESYQVQDELKQKIQQQ  
 GSPATG00012059001 811 DAAKNDLREQHKLKSVENEYENTKRLRQQCIDQLNERNNELELRVKFETGDLIKELENEKEQLATTEEQRNKLLEQN  
 GSPATG00013523001 811 DAAKNDLREQHKLKNIENEYESVKRLRQQQVDQLNERNSELELRVKFETGDLINENLEKEQLQTSSEEQRNKLLEQN  
 TTHERM\_01211770\_Tt 837 GQKQLELKDTHMKQIRAMEAEALSQKKTLSQCIDALNKELELLELRKVSIDHYETEVKTESDQLESQAIRTQLSFKL  
 TTHERM\_00657240\_Tt 815 DNRLQELKENHTREIKALENDFEKAKKRYIQCIDQLEKNSLELMRNKFEEDFQKTEQLKEQVQLKVNQRLEKN  
 AT5G46070\_At 731 -----FEVELASRLTLEMTDKLDSANKKALAYEKEA  
 GBP1\_Hs -----  
 GBP3\_Hs -----  
 GBP2\_Mm -----  
 GBP5\_Hs -----  
 GBP4\_Hs -----  
 LOC570622\_Dr -----  
 DDB0235201\_Dd 664 -----RLPPFRNSNSYSTQLNKLE

PTMB.422 879 KEMESNKHTQFREKELRMNQRKQLEELLSQCKQQLQNTGNLDKNSIEQQVNELRNYEMEKDVLERRIHEERQKADQKY  
 GSPATG00012059001 891 KMLDGGKQLIILKEQELRYQKKIKOLEQAIDEADAKIAKEVNLAQAKAEESLTQLKNFYEIERERLERRICEEKESDKKF  
 GSPATG00013523001 891 KTLDGGKLSILKEQELRYQKKIKOLEQAMDEADTKTAREVNQAQAKAEESLTQLKNFYEIERERLERRICEEKESDKKF  
 TTHERM\_01211770\_Tt 917 SESEEMKLKSSKDMKRFIQKIRELEETNEAIKDRSQSEIRENQAKSEESLQQLKNMFEIERETLEKRLIEEKREKRSY  
 TTHERM\_00657240\_Tt 895 SVLEDEKQKSFKEVEFRYINRIRLEDEETEEKQNAIKDIRESQAKSEESLAQLKNFYEIERETLERRLAEDKFKWDRY  
 AT5G46070\_At 764 NKLEQKIRMEQKYRSEFQR-FDEVKRCKAAEIEAKRATELADKARTDAVTSQEKESQRLAMER-----  
 GBP1\_Hs -----  
 GBP3\_Hs -----  
 GBP2\_Mm -----  
 GBP5\_Hs -----  
 GBP4\_Hs -----  
 LOC570622\_Dr -----  
 DDB0235201\_Dd 683 SLEKQIELKLNENVTQMKIWMESLDTVRVMMISRTPIFWFQHSYEN-----

PTMB.422 959 QILFEEQEQKMRDEQQYEEETETLKDELRLLEINLTQQQQYDNEELKKNQKNSMENINNETKEQLVQLNTFQTOVE  
 GSPATG00012059001 971 QAAQEEFYHKLRETEQNYEEETETLKDDDLRQVQOYNTNTIQQYDHEEALKQQTIEIEFEKHIKETKEQLISLQNNNTATLE  
 GSPATG00013523001 971 QAAQEEFYHKLRETEQNYEEETETLKDDDLRQVQOYNTNTIQQYDHEEALKQQTIEIEFEKHIKETKEQLISLQNNNTATLE  
 TTHERM\_01211770\_Tt 997 NQVVEEYEQKIREEQAALEEEIENLRDDIKYIEIOVINMQQYEHEDLQKQTIENLEKMLQETKALLSSQASYQSQLE  
 TTHERM\_00657240\_Tt 975 QLSCDBYQEQHREAQHTYEEETETLKDDDLRQEAQYHNVVQYEHEDLQKQTIETIEKYTKETKESLNLQSNNTATLE  
 AT5G46070\_At 830 -LAQTEBRAERQVENLERQKTDLEDELRLRVSEMEAVSKVTILEARVEEREKEIGSLKETNAQRAHNVKSLKLLDEER  
 GBP1\_Hs -----  
 GBP3\_Hs -----  
 GBP2\_Mm -----  
 GBP5\_Hs -----  
 GBP4\_Hs -----  
 LOC570622\_Dr -----  
 DDB0235201\_Dd 731 -----EAYRBAEKRIIDKIKSKPLRDKVIKQFINNDIKQQLNSLFLKSTILTLGIILIFSILISFSTIK

PTMB.422 1039 CRINNLNVTIQSLESQLTNQQNNQQLVKNQLMTOKLENLNVKLLQQLLSEFKQLKEDQEKEKTQLOEESLQQLRRKYTAT  
 GSPATG00012059001 1051 QMNSFTTERKSLIQKIDVLSQINNQLQKEMHALQOKKDLLNEKSRKEQQFEQSRKEWQEKKKEQLERLEETKLRRLQKM  
 GSPATG00013523001 1051 QMNSFTTERKSLISKNDVLSQINNQLQKEMHALQOKKDLLNEKTRKEQQFEQSRKEWQEKKRELIERLEETKQRLQKM  
 TTHERM 01211770 Tt 1077 QMASYNADRKELQOKYETVQKNLQLSDNKILTLTOKLESSEASYENKKKELAQKQDNIIERQALEEKLEETRKKYQEL  
 TTHERM 00657240 Tt 1055 QYINNFNAERKTFIQKVENLTQELSKKEKENIALQOKKENLEANLKKRESQLTQAKVEMQOEFRTENSNYIDDLKQKLQQA  
 AT5G46070\_At 909 KAHIAANRRAEALISLELQAAQAHVDNLQQLAQARIKETALDNKIRAASSSHGKRSRFEDVDMDIGEGSDRILR-----  
 GBP1\_Hs -----  
 GBP3\_Hs -----  
 GBP2\_Mm -----  
 GBP5\_Hs -----  
 GBP4\_Hs -----  
 LOC570622\_Dr -----  
 DDB0235201\_Dd 796 K-----

PTMB.422 1119 CDEYLEKKKINYEKATAISAQONEFFAKKVEFLERQLES CNLKYEERTKIQKQEWTOEELSDRLSKLNEEKQOLESKSTQLK  
 GSPATG00012059001 1131 NDEFLEKKIEYGREATALIQQONEFLQKKIEDLQRQLDTQQSRFDEKLLKQKNEYLVLEQLERAEKTALETTKYEKNK  
 GSPATG00013523001 1131 NDEFLEKKIEYGREATALIQQONEFLQKKIEDLQKQIDTQQSRFDEKLLKQKNEYSVLEQLERAEKTALETTKYEKIK  
 TTHERM 01211770 Tt 1157 SDEHLQTKINSEKSIASSQONEFYQKKVQELQVALESSTQRFEEERLKTSKAEWAQETLEKIQNLQDEKVNLESKINALK  
 TTHERM 00657240 Tt 1135 SDEQLQKKEFSREITALSNQRNEFLSKKNEELARQNETLICHYEEKIKILKQEMNQBLNEKTDKLLQQRDQMEKYEKVK  
 AT5G46070\_At 984 -----TNKRARSTRGDDHGPTDEGDEDFQSHQDNGEEEBEEDYRKLTLVQNLKHELTKYDCG  
 GBP1\_Hs -----  
 GBP3\_Hs -----  
 GBP2\_Mm -----  
 GBP5\_Hs -----  
 GBP4\_Hs -----  
 LOC570622\_Dr -----  
 DDB0235201\_Dd -----

PTMB.422 1199 KQLREKETQFLKAQQDLEKETALSTEKIVYLEQKLRHEHQQTSSSENSNAAMQLKQLREQFSLKSKSSSDIEQLKSQLTN  
 GSPATG00012059001 1211 KQLKEAEYQYKQASTLEREKAILTEKLGHLERARKNELESKLDKDEATITQQQAQLREQIAQEKKQLQOQELKYLQNLQ  
 GSPATG00013523001 1211 KQLKENEYQYKQASTLEREKAILTEKLGQLSRKNELESKIKDESASVAQYQALREQIAABKKSLOQELKYLQFNQ  
 TTHERM 01211770 Tt 1237 KSTKEFETQYKQRVTDLEKEKAIYVEKLQYTESKLRKEDTKYMIETEQLKQLSKAKFTSTBRKMLIQEIKLKSQNVQ  
 TTHERM 00657240 Tt 1215 KTLKEEATYKQLSQTEKEKAIYQEKLANIESKKSSELDMKYQAEENQYVMQILQLKEQYSLBKTLNEADKYKQFNQ  
 At\_NP\_199419 1040 HILLNRGHQNKKEILATYEAHVLPKKALAREEBRKKQREVTSS-----  
 GBP1\_Hs -----  
 GBP3\_Hs -----  
 GBP2\_Mm -----  
 GBP5\_Hs -----  
 GBP4\_Hs -----  
 LOC570622\_Dr -----  
 DDB0235201\_Dd -----

PTMB.422 1279 LEFEKQELQANYEKDKILWQKTFLESQRESLQKQELADAMKFFETITQTLQQRSLERNNDHNDITTEMLNQIERKYQDQ  
 GSPATG00012059001 1291 LEQDKSEIYTSYERDRALWEGKQFQLEQQKEQAKQDLDALAKKFEMTLMHLQARARSNEKDEQENNLNELLILLSVERKYQAO  
 GSPATG00013523001 1291 LEQEKSEIHTSYERDRALWEGKQFQLEQQKEQAKQDLDALAKKFEMTLMHLQARARSNEKDEQENNLNELLILLSVERKYQSQ  
 TTHERM 01211770 Tt 1317 LDNEKHELNTSYERDKVLWEGKFSFLQQKEQAKQDLIEAQRKFEQTLTHLQQRQNEKNERCSVSDMLMQTERKYQTO  
 TTHERM 00657240 Tt 1295 LEQDKNELITNYERDRALWEGKFAFLEQQKEQAKQDLADALAKKFEMTLMHLQARARSNEKDEHENNLNELLILLSMEKKYQNO  
 AT5G46070\_At -----  
 GBP1\_Hs -----  
 GBP3\_Hs -----  
 GBP2\_Mm -----  
 GBP5\_Hs -----  
 GBP4\_Hs -----  
 LOC570622\_Dr -----  
 DDB0235201\_Dd -----

PTMB.422 1359 VKDIQQHQKKCDDYQERIEERLEKEIKQSQSKELLDQQSKIG--QQFERKTAELLENEKRLISTIEELKQERDQORILEHH  
 GSPATG00012059001 1371 IEEANQTHORIVQDYEDKIRRLQKEVKTHKDKILIDQHGKIGNQLLSEKKFAEMLDNEKRLQOEIENIKQDRDQKILDYQ  
 GSPATG00013523001 1371 IEEANQTHORIVQDYEDKIRRLQKEVKTHRDKILIDQHGKIGNQLLSEKKFAEMLDNEKRLQOEIENIKQDRDYKIFDYQ  
 TTHERM 01211770 Tt 1397 ISELQETSNTKLSAANKITRLEAEKNSLDQTMMSRQKNSNAIFTEKRLAELLESEKKLSSELDIIRKERBAEKTEAQ  
 TTHERM 00657240 Tt 1375 INELNENNRVQDYEDKIRRLNKEIKQLKENMLVEKHGKLGNOMLNEKKLADFIENEKLLLEIEQLKNERDQKIIDYQ  
 AT5G46070\_At -----  
 GBP1\_Hs -----  
 GBP3\_Hs -----  
 GBP2\_Mm -----  
 GBP5\_Hs -----  
 GBP4\_Hs -----  
 LOC570622\_Dr -----  
 DDB0235201\_Dd -----

PTMB.422 1437 EEVEQEKEYWENKINEEERQRESDKKQSQLIFYHEKERAKWSQEKDYIMQOKMELQDQLSRIEKKKELLKENEKMKNS  
 GSPATG00012059001 1451 RMLEQERESLAKITETETKYKEVESKRSTLIFEFEKERAKWNLDRLHNNIKNELTQLDRIRKKEELLRLDNEKLNKNE  
 GSPATG00013523001 1451 KMLEQERENLAKIVELETKYKEVENKRSTLIFEFEKERAKWNLDRLHNNIKTELSDQLEKLSDKKEOLLRENEKLNKNE  
 TTHERM 01211770 Tt 1477 RKLDOERETLTKMLQTEEKFRFAEKKRNTLIFEFEKERAKWNLEKDLHLLNQKNELOENLNKTEKKKELLRENERLNKND  
 TTHERM 00657240 Tt 1455 RQLDTDKEVLRQKTAETEQKYKEAEOKRGTLIFEFEKERAKWNLDRLHLLVQKNELOHIDKLEKKKELLRENEKLNKNE  
 AT5G46070\_At  
 GBP1\_Hs  
 GBP3\_Hs  
 GBP2\_Mm  
 GBP5\_Hs  
 GBP4\_Hs  
 LOC570622\_Dr  
 DDB0235201\_Dd

PTMB.422 1517 SKSLRRYN---PNQTLNNSYLN-----KQASDKKIP----SQEVVNMSYDVTKSLEDKDPKQENLSTSTT  
 GSPATG00012059001 1531 QRATRRSV--AAHNMTSNNIMTG-----NKYRNPINNVSTIGLQKLSPTHSNNTSTSSANISVLKKTNLADITN  
 GSPATG00013523001 1531 QRATRRSV--AAHNMTSNNIKTG-----NTYRNPINNISTIGLQKLSPTHSNNTSTSSANISVLKKNLADITN  
 TTHERM 01211770 Tt 1557 SRQSRQF-ERLSDQNSNIFLTQ-----NRQMMNANQPSFLNMSRNMGSEKSPMRSARSRERSLNDYSYANN  
 TTHERM 00657240 Tt 1535 SRVTRRSINLVGTGIQSNTALSSSKSGIKRSGTTNQQQSPVSNISLS-KKNSMIQENNQFMSNSNLNQOK--NLNDITN  
 AT5G46070\_At  
 GBP1\_Hs  
 GBP3\_Hs  
 GBP2\_Mm  
 GBP5\_Hs  
 GBP4\_Hs  
 LOC570622\_Dr  
 DDB0235201\_Dd

PTMB.422 1576 FGSFKKYQMMSKQVS-----PSKTKEISDI-----  
 GSPATG00012059001 1598 FEKVVVPTQQSFQNNKY-----YFYGNQQGQNDSDSMIGQSDQFQK-----  
 GSPATG00013523001 1598 YEKTAPLTQQSFQNSKF-----YYYGNQQGQNDSDSMIGQCEQFQK-----  
 TTHERM 01211770 Tt 1625 SVDCGEDNGSSDNNTNN-----ILENLNLSNRENQPIQNTPPANGFKSFMQVLQEKSGLNENKPPVS  
 TTHERM 00657240 Tt 1612 FAGIMPYDPSRQMNQKLTSLNSQEDEAQQNQFLQYQYLMQDQQAQQLISSNNMQYNNPNMSSPQAPMFPNPSNYGQQNIY  
 AT5G46070\_At  
 GBP1\_Hs  
 GBP3\_Hs  
 GBP2\_Mm  
 GBP5\_Hs  
 GBP4\_Hs  
 LOC570622\_Dr  
 DDB0235201\_Dd

PTMB.422  
 GSPATG00012059001  
 GSPATG00013523001  
 TTHERM 01211770 Tt 1689 PSKKENVLI-----  
 TTHERM 00657240 Tt 1692 PQNSQPFQIEKFKYFNSNV  
 AT5G46070\_At  
 GBP1\_Hs  
 GBP3\_Hs  
 GBP2\_Mm  
 GBP5\_Hs  
 GBP4\_Hs  
 LOC570622\_Dr  
 DDB0235201\_Dd

```

PTMB.186_Pt 1 MPH-----YPEEIEYSDKYLDYVEYRHHVILPKHIFKKITKG-----KLLNEMEWRALGVQ
CKS101b_Pt 1 MPH-----YPEEIEYSDKYFDYVEYRHHVILPKHIFKKITKG-----KLLNEMEWRALGVQ
CKS102a_Pt 1 MPH-----YPEEIEYSDKYFDYVEYRHHVILPKHIFKKITKG-----KLLNEMEWRALGVQ
CKS102b_Pt 1 MPH-----YPEEIEYSDKYFDYVEYRHHVILPKHIFKKITKG-----KLLNEMEWRALGVQ
CKS103a_Pt 1 MPH-----YPEDIEYSDKYQDDYVEYRHHVILPKHIFKKITKG-----KLLSEMEWRNLGVQ
CKS103b_Pt 1 MPH-----YPEDIEYSDKYQDDYVEYRHHVILPKHIFKKITKG-----KLLSEMEWRNLGVQ
CKS103c_Pt 1 MPH-----YPEDIEYSDKYQDDYVEYRHHVILPKHIFKKITKG-----KLLSEMEWRNLGVQ
Cks-1_Ce 1 MTT-----GNNDFYYSNKYEDDEFEYRHHVILPKHIFKKITKG-----RLMSETEWRSLGLQ
Cks-2_Ce 1 M-----EDIIYSPYEDDEFEYRHHVILPKHIFKKITKG-----RLLSEAEWRRAAGVQ
CKS1_At 1 M-----GQIQYSDKYFDYVEYRHHVILPKHIFKKITKG-----RLLSEMEWRRAAGVQ
CKS2_At 1 M-----GQIQYSDKYFDYVEYRHHVILPKHIFKKITKG-----RLLSEMEWRRAAGVQ
CKS1B_Hs 1 MSH-----KQIYYSDKYFDYVEYRHHVILPKHIFKKITKG-----RLMSETEWRNLGVQ
CKS2_Hs 1 MAH-----KQIYYSDKYFDYVEYRHHVILPKHIFKKITKG-----RLMSETEWRNLGVQ
Cks30A_Dm 1 MS-----KQIYYSDKYFDYVEYRHHVILPKHIFKKITKG-----RLMSETEWRNLGVQ
Cks85A_Dm 1 MPA-----DQIQYSDKYFDYVEYRHHVILPKHIFKKITKG-----RLMSETEWRNLGVQ
Cks1_Sc 1 MYHHYHAFQGRKLTQERARVLEFQDSIHYSPYSDDNVEYRHHVILPKHIFKKITKG-----RLLSETEWRNLGVQ
suc1_Sp 1 MSKSGV---PRLLTASERERLEPFIQIHYSPYADDEFEYRHHVILPKHIFKKITKG-----RLLSETEWRNLGVQ

```

\_\_\_α0\_\_\_
\_\_\_β1\_\_\_
\_\_\_β2\_\_\_
\_\_\_α1\_\_\_
\_\_\_α2\_\_\_

```

PTMB.186_Pt 52 QSRGWSHYETHRPEPHILFRPKNTDPNTGLPPP-----GFSAPY
CKS101b_Pt 52 QSRGWSHYETHRPEPHILFRPKNTDPNTGLPPP-----GFSAPY
CKS102a_Pt 52 QSRGWSHYETHRPEPHILFRPKNTDPNTGLPPP-----GFSAPY
CKS102b_Pt 52 QSRGWSHYETHRPEPHILFRPKNTDPNTGLPPP-----GFSAPY
CKS103a_Pt 52 QSRGWSHYETHRPEPHILFRPKNTDPNTGLPPP-----GFSAPY
CKS103b_Pt 52 QSRGWSHYETHRPEPHILFRPKNTDPNTGLPPP-----GFSAPY
CKS103c_Pt 52 QSRGWSHYETHRPEPHILFRPKNTDPNTGLPPP-----GFSAPY
Cks-1_Ce 52 QSPGWSHYETHRPEPHILFRPKNTDPNTGLPPP-----GFSAPY
Cks-2_Ce 48 QSLGWSHYETHRPEPHILFRPKNTDPNTGLPPP-----GFSAPY
CKS1_At 48 QSRGWSHYETHRPEPHILFRPKNTDPNTGLPPP-----GFSAPY
CKS2_At 48 QSRGWSHYETHRPEPHILFRPKNTDPNTGLPPP-----GFSAPY
CKS1B_Hs 50 QSQGWSHYETHRPEPHILFRPKNTDPNTGLPPP-----GFSAPY
CKS2_Hs 50 QSLGWSHYETHRPEPHILFRPKNTDPNTGLPPP-----GFSAPY
Cks30A_Dm 49 QSRGWSHYETHRPEPHILFRPKNTDPNTGLPPP-----GFSAPY
Cks85A_Dm 50 QSPGWSHYETHRPEPHILFRPKNTDPNTGLPPP-----GFSAPY
Cks1_Sc 81 QSLGWSHYETHRPEPHILFRPKNTDPNTGLPPP-----GFSAPY
suc1_Sp 78 QSLGWSHYETHRPEPHILFRPKNTDPNTGLPPP-----GFSAPY

```

\_\_\_β3\_\_\_
\_\_\_β4\_\_\_



Msh2 At 1 MEGN--FEEQNKLPFLKDAKQAQCFILSFYKTL P--NDT-RAVRF FDRKDYTAHG--ENSVFIAKTYHHTTALR--QLG  
Msh2 Zm 1 MEGDDFTPEGGKLPFKLDARQAQCFISFFKLP--QDP-RAVRF FDRRDYTAHG--ENATFIARTYYHMSALR--QLG  
Msh2 Hs 1 -----MAVQPKQ--TLOESAAEVGFVRFQGM P--EKPTTTRVLFDRGDFYTAHG--EDALLAAREVFKTQGVK--YMG  
Msh2 Dr 1 -----MAVQPKQ--NLSMDSASHCFLINFFSMS--DKPDTTVRVFDNRDYYTVHG--KDALFAAREVFKTNGVIK--NLG  
Msh2 Dm 1 --MQAKATDSRQEPFLNMDTNARNRNFKTHAKL G--EKPATTVRVFDHDTDRYTVHGSDDCELVAKIVYKSTAFIG--ALL  
Msh2\_Ce 1 -----MSGGKDEASKLILKILKSKS-----PNTATVFSRGEYFSVYG--DDATFVATNIFKSDVCKVTFSTLS  
Msh2\_Mg 1 -----MSSRPELK--VDDHCFIRFFKSL P--AAHKDTTRVFFRGDYTAHG--EDANLIARTVYKSTSVVR--QLG  
Msh2\_Nc 1 -----MSSRPELK--VDDHCFIRFFKSL P--QLGEEATRIFDRGDWYTAHG--DDATFIARTVYKSTSVIR--QLG  
Msh2\_Sc 1 -----MSSTRPELKFSVDSEERNFYKKTGL P--KKPLKTRVVDKGDYTVVIG--SDATFVADSVYHMQSVLKNQCQLD  
Msh2\_Dd 1 -----MSDNEQEESQVFLKEDKTEVTFEQSLVSSNEDTDTTRIFDRKGYSTHG--EDAVEVAMMHEKSKKSLKYWSIS  
Msh2\_Tb 1 -----MSDDRDPVVQAFENGAGGDDTSLRIFSR--ASAGCFILGSWASLVAREYVKSSTAVLKN----  
Msh2\_Tc 1 -----MTDERDVSVLQAEATAVGGDDKACVRF SRGGSTPGCYVLGSWAGFIAREYIRSTAVLKN----  
Msh2\_Pf 1 -----  
Msh2\_Py 1 -----  
Msh2\_Tt 1 -----  
PTMB.344 1 -----

MutS\_I

Msh2 At 73 -----SGSNALSSVLSRNM--FETIARDLLELRNDHTVELYEGS-----GSNWRLVK  
Msh2 Zm 75 -----SSSDGILSASVSKAM--FETIARNILLETDCTELYEGS-----GSNWRLTK  
Msh2\_Hs 69 P-----AGAKN--LQSVVLSKMN--FESFVKDLLLVKQ--YRVEVYKRNAGNKASKENDWYLAY  
Msh2\_Dr 69 -----SGNRR--LESVLSKMN--FESFVRDLLLVKQ--YRVEVYKRN--ASKSKKEHDWQIAF  
Msh2 Dm 75 P-----DDKKETLQFVMSKGN--FELAVRDLVVLRN--YRVEVYVK-----NSSDWEIEY  
Msh2\_Ce 62 -----TDNSQQKYISVNRGQ--YEKVVRETIIVLLR--CSVELYSSEQ-----GWNKMTK  
Msh2\_Mg 65 -----RSDHTGLSSVTLSTV--FKQFLRDLALYKLG--KRVEIYESAN-----GRMNKVVTK  
Msh2\_Nc 65 -----RSDHTGLPSVMTVTV--FRQFLRDLALFKLG--KRTEI WASPS-----GRMNKVVTK  
Msh2\_Sc 71 PV-----TAKNFHEPTKYVTVSLQV--LATLLRCLLDLGL--YKVEIYDKG-----WKLKIK  
Msh2\_Dd 74 DPNPKKKIKIDNDGSLTTTASSQQQQEGLAVLTIRQGYEENIVKLELDEKK--KTEIWSMKP----NSKQOQWELIK  
Msh2\_Tb 58 -----WSGVDAVAVNDSITREVIKCLLRG--VSVVQYDRQT-----SGGRVVCMR  
Msh2\_Tc 60 -----WGGVDVVVNDIAKEVIRDCLLRG--ASVEYVERPP-----GGGTACVQ  
Msh2\_Pf 1 -----  
Msh2\_Py 1 -----  
Msh2\_Tt 1 -----  
PTMB.344 1 -----

Msh2 At 119 TGSPGNIGSFEDVLFANNEMQDTPVVSIFPSFH-----DGRCVIGMAYVDLTRRVLGLAEFLDSDRFITNL  
Msh2 Zm 121 SGTPGNIGSFEDILFANNMEDSPVIVAFPCACR-----ESQLYVGLSFLDMTRKRLGLAEFPEDSRFINV  
Msh2\_Hs 122 KASPGNLSQFEDILFGNNMMSAS--IGVVGKMS-----AVDGRQVGVGYVDSIQRLGLCEFPDNDQFSNL  
Msh2\_Dr 119 KASPGNLTQFEEILFGSGGGPAEGAVGVGVRLGT-----GTDGQRVGVGYVDSILRKLGVCFEPDNDQFSNL  
Msh2 Dm 122 RASPGNLTQFEDILFSNKEVLVGNSITSLVLKLD-----GGQRRVGVASVEQNDCKRFQLEFLDDEFFTEL  
Msh2\_Ce 108 RASPGNTVDVEFEQENGVSQAPIAIIYHFGDDN-----RVTECAWDAGNVRVISEIITDPSFSQT  
Msh2\_Mg 113 QASPGNLQDVEDELGGQFEGAPVILAVKISSKAS-----EAR-NVGVCFADASVRELGVSEFLDNDLFSNF  
Msh2\_Nc 113 QASPGNLQDVEDELGGQFEGAPVILAVKISSKAS-----EAR-TVGVCFADASVRELGVSEFLDNDLFSNF  
Msh2\_Sc 118 SASPGNLEQVNELMNMNIDSSIIIASLKVQWNSQ-----DGNCITGVAFIDTAYRVGMLDITVDNEVYSNL  
Msh2\_Dd 148 KASPGNTQMFEDVLLNGNCEGSMMAIKVITREK-----SIVEGISEGDAFFKRTIGVSOQFMNDNLSNL  
Msh2\_Tb 103 RASPGHIADEFAMLFAFEDAIEIQLMAGSVVIDKANRVNG-----PGGQHVRCYAAINTLRLTIYAEYHDTPQLTNL  
Msh2\_Tc 105 RASPGNITDFEATLFSFEAEIQLMATGAVILEKNNTSGNAGKCMISGGQIRVGFALNTLRLTIYAEYDITLQITSL  
Msh2\_Pf 1 -----MENEVEEVNEDQLICLYIDTKKY-----QKSLGVCFYNYLKYEFFLMTEFDNGHETAL  
Msh2\_Py 1 -----MEDGTKLLVSLISEFRNN-----IRYVGCICYNNTNEFSLSEVTEIENDHETTL  
Msh2\_Tt 1 -----MEPELNVNDKNLMVLAIVYFYPNN-----TROVNAAILDSDORKFOVTEFQDTEYYSNF  
PTMB.344 1 -----MDQDQNLITLVVQIYITNN-----ERHINCAFLDQDRMIEVCEFOQDNHESVF

MutS\_II

Msh2 At 185 ESSLIALGAKG-----CIFPAE--SGKSNCKSLYDSLERCAYMIT-----ERKK  
Msh2 Zm 187 ESALVALGCKE-----CLLPAD--CEKSIDLNPLQDVISNCNVLLT-----EKKK  
Msh2\_Hs 188 EALLIQIGPKE-----CVLPGG--ETAGDMGKLRQIIRGGILIT-----ERKK  
Msh2\_Dr 188 EALLVQIGPKE-----CVLPAG--DSGGDQGLKQVVORGGILIT-----DRKK  
Msh2 Dm 189 EATVVLGPKG-----CLLPS--IEGEYSAVTLLDRNGVMIT-----MPKK  
Msh2\_Ce 170 EQCFGICFTEY-----ILVNEGSAVPAKAKKIASMFTREMEVHNK-----OQLK  
Msh2\_Mg 177 EALLIQIGVKE-----CLIQYDKAEDLKDPLAKLROIIDNCGVAMS-----ERPM  
Msh2\_Nc 178 EALLIQIGVKE-----CIVTQDKGEKEKDPILAKLROIIDNCGVAMA-----ERSA  
Msh2\_Sc 184 ESFLIQIGVKE-----CLVQDLTNSNSNSAEMQKVIINVIDRCGCVVT-----LLKN  
Msh2\_Dd 212 SSFTMQMSVKE-----CLLCCD--QKNYVYQKVKELSDAGIPFI-----ELPK  
Msh2\_Tb 178 DVLMAOCNLKQLLYSN-----TDFSMNNTGEKAADSDESREQSLLRALKOLCERANITLQERGO-----SNLPHGKQKS  
Msh2\_Tc 185 DALMAOCNLKELIYLDRSRCRISNSNKGGAAGVAGSGREEESLRAVKOLCERANITYRELGHNGAAPSHDSPQKPLQ  
Msh2\_Pf 55 ESFLIQKREHK-----CFFNSTNDLVDERLNLNFKICNVQAI-----PLEK  
Msh2\_Py 49 ESFLIQTNFDS-----LIYLPNCNIDNKRINLINCNEIKLC-----ELNK  
Msh2\_Tt 56 ESFLIQTNFQNG-----HTQFLLLIQYDPLTTEKEKVNIDIVQOCDINVK-----EKDK  
PTMB.344 50 ECLVLOVNEGQ-----DAKTVLIQMPLESENKRVKRDILEQCEFEVI-----EKNK

Msh2\_At 228 HEFKGRDLDSDLKRLVK----GNIEPVRDLVSGFDLTPALGALLSFSSELLSNEDNYGNFTIRRYDIGGFMRLDSAAAMRA  
Msh2\_Zm 230 ADEKSRDLAODLGRIR----GSVEPVRDLSSQFDYALGFLGALLSYAELLADDITNYGNVTHEKYNLNCFMRLDSAAVRA  
Msh2\_Hs 230 ADFSTKDYODLNRLKGGKGEQMSAVPEMENOVAVSSLSAVIKFLELLSDDSNFGQVETLTFDFSQMRLDAAAVRA  
Msh2\_Dr 230 SEFTTKDITVDLNRLKARKGETVSSAAPEMEKKIAMSCLAVIKYLELLADEANFGSEKMTTFDLNQFMRLDAAVQA  
Msh2\_Dm 229 S--GDNDLQDLNRLRFAKQQQEDATGKELQQLASNAKTAIKYLDLVNDAGNLGHMETKQDLNRFVHLDAAVAA  
Msh2\_Ce 213 PKSQSDVIESVHLDYK----DEAEKQENIKECLOLHNSNAADYSEISEKYSIFNYGTHGNMLDSCAVEA  
Msh2\_Mg 223 ADFGTRDTEODLARLLK----DEARSALFPQTDLKLAMGAASALIKYLNVLQDPSNFGQVQLYQHDLSQFMKLDAAALKA  
Msh2\_Nc 224 GEFGTKEDEODLSRLK----DERAASLFPQTDLKLAMGSASALIKYLGHLHDPNFGQVQLYQHDLAQFMKLDAAALKA  
Msh2\_Sc 230 SEFSEKDYVELDITKLLIG----DDLALS--FPQYKSLSMGACNALTYGLQLLSEQDQVGMKELVEHKLKFMKLDASATKA  
Msh2\_Dd 254 SDESSNAEODLTRLG----SVKNNMPPDIEQEHAIQSASCLIKHLDLNSPNYFGKPKLEKYDLDRFMKLDSSSFKG  
Msh2\_Tb 248 RATKRNSGPNGLLSTLEGILRVPEDRHGLNSFELASRALESLESASIDPFDSLNQHTFYLKHVVVPSFMKLDAAATEA  
Msh2\_Tc 265 PQRRREGNVTKGDFLSALEDILRVPEDRALSNCPASRAEYLSNIDNFDAINHRAYLKHITISSTFMKLDAAATQA  
Msh2\_Pf 97 KKIDATNKDELKLTISHND---DVRNYDKHLELENACKCLMVLINYLKIKENQDIHNQCKINIHMDLVMRLDAAALSA  
Msh2\_Py 91 DIFQIMS--ETDLERLINVND---DVKNYVSFLNLTGCKALSSIKYLNLLNEDSAINKCTLKWYNISKYVKLDKAAATCS  
Msh2\_Tt 104 KSFLKGYEDDLNKLKPK----LAQYIQESQLTHASSLACVYGDQLSKEPNNQNFVETLTLNFMKLDAAAINA  
PTMB.344 98 KDESEINLSN--LNKVLKKN----FNTCRVEEQICT--QCLQCLLEHTRLYKDDINTQKFNIGLNLNHFMRDLDAAINA

MutS\_III

Msh2\_At 304 LNMES-----KTDANKNFSLFGLMNRTCTAGMGKRLHMLWKQPLVDLNEIKTRLIDVQCFVEEAG  
Msh2\_Zm 306 LNTAEG-----KTDVNKNFSLFGLMNRTCTVGMGKRLNRLWKQPLLDVNEINNRLDMVQAFVEDPE  
Msh2\_Hs 310 LNTFQG-----SVEDTGT---QSLAALLN--CKTTPQGQRLVNWQWKQPLMDKNREERLNIVEAFVEDAE  
Msh2\_Dr 310 LNTFQG-----SSDDATGT---HSLAGLLN--KCRTPQGQRLVNWQWKQPLIDKNKEERLDIVVETVEDSE  
Msh2\_Dm 307 LNTMPK-----PGTHPSMPSYRWQSLVGLVD--HCRTPQGHRLMGQVWKQPLRSRNIINDRHNIVQCLLESPE  
Msh2\_Ce 281 LNFQFLN-----YNYLEKSNLILNVLN--KCKTLPGERLLRDWLSRPLCQIDHINERLDIVVEALFENQT  
Msh2\_Mg 299 LNTFTP-----GARDGSKTMSYGLLN--HCKTPVGSRLLAQWLKQPLMSKDETEGRQQLVEAFVNDTE  
Msh2\_Nc 300 LNTMP-----GARDGAKNMSYGLLN--HCKTPVGSRLLSQWLKQPLMNAEETEKRQQLVEAFVANDTE  
Msh2\_Sc 305 LNTFPQGQNPFGSNNLAVSGFTSAGNSGKVTSLFQLLN--HCKTNAGVRLNNEWLKQPLINIDEINKRHLDVYLDQIE  
Msh2\_Dd 328 LHTIDLK--DSSVSAAGGGGAGGASSSNKDSLNNLLN--QCNTPMGSRLLOWVWKQPLNAEETEARLNVEAFVNDLE  
Msh2\_Tb 328 LHTIHRK-----PEARGSMTSISWLN--RCTTGMSRRLMQWLLQPLRSIEDINORLSIVQIMVESPI  
Msh2\_Tc 345 LHTIHQK-----PEARGLPTSVYSWLN--RCVTGMSRMMRQWLLQPLRNAEETEINORLSIVVELMVEDSI  
Msh2\_Pf 174 LNTILP-----NKNIHNSYN-----NNTSLKFLD--KCNTTIGSKKLVSWLQPLTNVAEINKRLNIVEFFKEDD  
Msh2\_Py 168 LNTNTYISKE--QKNGIGGSQQTLSQNHGNTMILYKFLN--KCKTKTGERKLLKWMHPHIDEKKNORLDIVVEIMNDQQA  
Msh2\_Tt 179 LNTFFPKEDI--QRNLMGGQE-----NFSITVDLDD--CKKTQIGSRFLKRWLQPLKNEAENRRLDIVEYVFNQDQ  
PTMB.344 170 LNTFFPKQ-----GIKQFDSG-----NNASITVDYLD--RCTIQMGKRLRRWIKMPLQSIQIEINORLNIVEYLYQNS

Msh2\_At 366 LRQDLR-QHLKRTSDVERLRLRSLERRR-----GLQHIKLYQSTIRLFFIKTAMQOYT  
Msh2\_Zm 368 LRQGLR-QQLKRTSDIDRLTHSLRKKSA-----NLQPVVLYQSCSRIPYIKGIIQOYN  
Msh2\_Hs 372 LRQTLQEDLLRRFPDLNRLAKKFORQAA-----NLQDCYRLYQGTNQLNPNVIALEKHE  
Msh2\_Dr 372 LRKSCQEDLLRRFPDLNRLAKKFORQSS-----NLQDCYRVYQSVGQLNPNVLAHERYS  
Msh2\_Dm 373 TMTLSLSEYLRKRPDILMLTKKLMRKA-----NLQDLFRYQVILRTPKLIKVLHELD  
Msh2\_Ce 345 LRQKLRDSILARMPDCSOLARRLMKCT-----LQDLNRFYQATLLETVMQIHELD  
Msh2\_Mg 360 LRQTMQEEHLRSIPDLYRLAKRFORKKA-----NLEDVVRAYQVIRLPGFIGTLEGVM  
Msh2\_Nc 361 LRQSMQEEHLRSIPDLYRLSKRFORGKA-----TLEDVVRAYQVIRLPGFIGTLEGVM  
Msh2\_Sc 384 LRQMLTSEYLPMPDITRRLTKKLNK--RC-----NLEDVLYQVFSKRIPETVQVFTSFL  
Msh2\_Dd 406 LRQSLRSNDLKKIGDLDRLSKKLHGQKA-----TLEDVNLVYGIWTRLPVWLQSIHNS  
Msh2\_Tb 391 LRDALITQVLRRCMDMDRLNRRKLRRTV-----ALKDLSQILVFNTPFLAVDVIRTYH  
Msh2\_Tc 408 LRDALLSQVLRCCGMDRLNRRKLRRSI-----ALKDLSQILTFWNTIPRAVQVIRTHQ  
Msh2\_Pf 238 ARNVIFCNLYLRKIPDLKLNHYLKEIN---QNNIEIRVNS-----KYNEEMILKDIVKMYSLDFQIYFTKPIQ  
Msh2\_Py 246 LRSMTQGYLRKVCDDLILIKKLIKIANNVKNNMSDNHGAKQNRSGNSNNKCTIEDLVKLYDTVIASKNIYHAIIDEYN  
Msh2\_Tt 250 LRNYIQNEFLRKTADLDKLYAKFYKVAS-----KKNHNASLADCLKVLVQVLTNLTSLAQYTI--EN  
PTMB.344 236 FRQFLNEFLKRIPLDLKLYAKFYKVAS-----DKRNNANLSDCVKVVYQLLQKIKDLIKRVNQEM

Msh2\_At 419 G-----EFASL--SERYLKLEASDQDHLGKFI--DLVECSVDLDOLE--NCEYMISSSYDTKLASLKDQKLEEQOHELH  
Msh2\_Zm 421 G-----QFSTLRSKFLPELEWMAKNRGRFSSLVEATDLAQLE--NCEYRISSELYSSDLGVKDEL SVVENHINNLI  
Msh2\_Hs 426 G-----KHQKLLAVFVTPLTDIRSD--FSKFOEMIEITLDMDOVE--NHEFLVKPSFDPNLSERREIMNDLEKMQSTL  
Msh2\_Dr 426 G-----KHQVLLHAAFTSPINDLISD--FSKFOEMIEITLDMNOVE--HHEFLVKPSFDPNLSERRENDRLEKAMQAL  
Msh2\_Dm 427 -----NSTESVICAFKSKFLKD--LGLKQMVQVDFALE--RGEYLVKASFDRLMEQQMMTELYSKMVELO  
Msh2\_Ce 398 EAEQ---FAPSINRLLKSEITETLKK--VERFQVLCDEFDFEYEKENKEIRVVDVFPVEIQEISEKLEQELVFAEKLK  
Msh2\_Mg 414 D----EAYRDPDVAVYTKLRELSDS--LVRLQEMVETVVDLDALE--NHEFIIKLEFDGRLIRKKLDRIRTEMDREF  
Msh2\_Nc 415 D----EAYRDPDDEVYTNKLRLELSDS--LVKLEQEMVETVVDLDALE--NHEFIIKLEFDGRLIRKKLDRIRTEMDNEF  
Msh2\_Sc 437 EDDSPTEPVNELRSVWVLAFLSHHVEP--LSKFEEMVETVVDLDAYENNEFMKIVEFNEELGKRSKLDLDRDETHSHI  
Msh2\_Dd 460 S-----IHQELKVNFESELESISD--FAKFCAMVETLDDLANDKHEYVIRSSFDLTLRGLQKKEQISNKIEFRF  
Msh2\_Tb 445 GGH----DSSLLKGYVTPLEDISEH--LSNLRTLINATVVDLSDEN---TVRINEEFDLDFSERQRQNLVRAATEKEN  
Msh2\_Tc 462 GGR----NKKLIMDEYIAPLEDINEH--FSNLRLLITATVVDLSDEN---TTRINEEFDLDELMEEEQRKSVVKALESEH  
Msh2\_Pf 306 G-----KNKETDEIINPLRDIINK--FSKLDMEIEITDLEVEQENKVIYLISTSFDNELEIANEKNALMKKIKKHK  
Msh2\_Py 326 NGTQK-KNTKKTLEENFIPKSLIIS--LTSFLKLEITVVDLQIKN--QFLLISENFDNLMALSKKEEETIKYQKLLHR  
Msh2\_Tt 308 NHS----ADELAQREFLIPLGEILEN--FEKLSMIDQSIDMEKARRDNEYQVSSKFSPTLAEAKQKQKMLKQTESLR  
PTMB.344 296 YQS----QNSIIQEIFLKEFENLSD--FEKLEEMIEKSIDLSKAYTG--EIVNERFSKLMQLSKNI--TQCMNDLENVR

Msh2\_At 492 KKTAFIEFLDLQV-----DKAKLKDAAQFGHWFRITKKE--EPKTRKILTTQFIVLETRKDGVKFTNT  
Msh2\_Zm 494 VDTASDLDLVS-----DKQKLEKGS-LGHVFRMSKKE--EQKVRKILTGSYLIIEERKDGKVFNTS  
Msh2\_Hs 497 ISAARDLGLDP-----GKQKLLDSSAQFGYFRVTCKE--EKVLRNNKN--FSTVDTRKNGVFTNS  
Msh2\_Dr 497 SSAARELGLA-----AKTVKLESNAQIGYFRVTCKE--EKSLRNNK--FTTLDVQKNGVFTNS  
Msh2\_Dm 495 FKCSQELNLDG-----KNQVKLESVAKLGHFRITVKD--DSVLRKNKN--YRIVDVIKGGVFTSD  
Msh2\_Ce 472 KKYSAKFECDN-----LKLDKNSQYGYFRVTLKE---EKSIRKDKVHILETTKSGVVFVSG  
Msh2\_Mg 486 SKAADDLGOEK-----EKKLFLENHKVHGCMRLTRTE--AGCIRNNSG--YQECSTOKNGVYFTTK  
Msh2\_Nc 487 AAEDLGOER-----EKKLFLENHKVHGCMRLTRTE--AGCIRNNSR--YTECSTOKNGVYFTTK  
Msh2\_Sc 515 LPSAEDLGFDP-----DKKLEKLEHHLHGCMRLTRND--AKELRKHKK--YIELSTVKAGLEFSTK  
Msh2\_Dd 532 VDIADDLNLD-----EAKVKLHYSEKDMFLRISRKD--EVALRDKKK--YIVHATAKDGVRFATR  
Msh2\_Tb 515 HRVLKQCGWT-----EKQMKCEYHASYGVFRVPRKD---DHQVSTSKELITVSTAKDGVVFSVG  
Msh2\_Tc 532 QRVMKVYGTW-----EKQMKCEYHTTYGVFRVTRKE---DQQVSTSKELITVSTSKDGVRFVSE  
Msh2\_Pf 378 DVEKDI--FADKYDRTYKRAN-----REDLELVDCNTNVLFRVTKK--DCGLVQDDKKKYMIVRMNKNEFLFTTN  
Msh2\_Py 402 SEVEEDINYLKKGDKQSKNNKNISSNNSGMKDKLIDCNTNVLFRVTKK--DIIIFIQQKKTYNQVRVNKNEIFLNTN  
Msh2\_Tt 381 NEYAOEL-----GVEPKLVESTHTTYLFEKSKKETDEAFRRLSRKYSISVKKGCLSTTDD  
PTMB\_344 368 LDTETEL-----GITVTLIESGTYTYFEAKKQSADEAFR--KNPKKYKTLISVKNRAITFTTVE

Msh2\_At 552 KIKKLGDOYQSVVDDYRSQCKELVDRVVEVTVTSSEVFFEDLAGLISEMDVLLSFAADLAASCPYVQRPEITSS-----  
Msh2\_Zm 553 KIKNLSDOYQALFGEYTSCKKVVGDVVRVSGTSEVFFENFAAVLSELDVLQSFADLATSQVYVVRPDITAS-----  
Msh2\_Hs 555 KIKTSLNEEYTKNKTEYEEAQDAIVKEIVNLSGVEVPMQTLINDVLAQLDAVVSFAHVSNGAPVYVRPALEK-----  
Msh2\_Dr 555 KLSLNEEYTKSREEYEEAONAVKEIISTAAAGYVDPVQTLNEVIAQLDAVLSFAVVSAAAPVPTRPKILEK-----  
Msh2\_Dm 553 KLEGYADEEASCTRYEEQQLSIVVEIITHAVGYAAPITLLNNELAQLDCLVSTAAARSAPTYPVVRPKILEE-----  
Msh2\_Ce 527 ELSDINDELEFHLKYTRAEVVISMLCKAEETPLIPAMAQTLATLDVDFVSLSTFAATSSGIVTRPNLPLG-----  
Msh2\_Mg 544 KIQSLRREDQLSQSYNRTQSSLVNEVVSVAAASYAPLLENLAGLHAHDVIVSFAHCSMHAPISVYVRPKIHR-----  
Msh2\_Nc 545 TLQALRREDQLSQSYNRTQSSLVNEVVSVAAASYCPVLEBRLAALAHLDVIVSFAHCSVHAPISVYVRPKIHR-----  
Msh2\_Sc 573 QLRSIANETNILQKEYDKQSSALVREIINITLTYTPVFEKLSLVAHLHDVIVASFAHTSSYAPIYTRPKIHPMD-----  
Msh2\_Dd 589 EIDDLNEAYKKSAAEYLDKODGLAKRTLOAAASEVPLEDLSLITATLDVDFVTLSHVSSITAPIPTRPETIPLGS-----  
Msh2\_Tb 572 KLSLSEQYKGITEDYKTRQVLLKKLVDVATYLPVLDDAKELLAALDVFVAWATVVRDSDPHMVRPTIRTPETEEEQ-----  
Msh2\_Tc 589 RLSLSEQYKGRKRVYDVRQDRLKQKLVSTVVTYLPVLDDAKELLAALDVFVAWATVVRDSDPHMVRPTIRTPETEEEQ-----  
Msh2\_Pf 446 TLKRLCKQYDHLNINYNLQSEIINKNTICAVSYTYPEVLEKFDLIVSTLDVLISEFVVCHNSPFFVYVRPVVDHG-----  
Msh2\_Py 480 KLRDLCKQYQYVLSYNTSOEHLANKAEVASSYWEFNNKSKITISQIDIFCSFAYVISQCISTYVYVRPVVHNSG-----  
Msh2\_Tt 438 ELQACVAEYNSLKNDYQEQBSVVOKILDVSYTYPAMBRASFVISELDVLANFASLVNSATREYVYVRPVVHNSG-----  
PTMB\_344 424 KLOSTVADYVHFRDLYQEVQQRKQVEIKLVVSYVPMQASRLISEIDVLSAFASVARNAPRAIVVRP--ITFEK-----

Msh2\_At 625 -----DAIDIVLEGSRRHPCVEAQDW--VNFIPNDCLRMGKSWFOIIVTGNMGGKSTFIROVGVIVLMAQVGSFVPCDK  
Msh2\_Zm 626 -----DEGDIVLGSRRHPCLEAQDG--VNFIPNDCTLVGKSWFOIITGNMGGKSTFIROVGVIVLMAQVGSFVPCDQ  
Msh2\_Hs 628 -----GQGRILKASRHACVEVQDE--IAFIPNDVYFEGKQMHIIITGNMGGKSTYIROQTVIVLMAQIGCFVPCDE  
Msh2\_Dr 628 -----GSCRVLKAAARHPCVEAQDE--VAFIPNDVTFTRGKMHIIITGNMGGKSTYIROVGVIVLMAQIGCFVPCDE  
Msh2\_Dm 626 -----GARELVLEDVRHPCLELQEH--VNFIANSDVDFKEECNMFIIITGNMGGKSTYIRSVGTAVLMAHIGAFVPCSL  
Msh2\_Ce 601 -----SKRLELQKCRHPVTEGNSE--KFFIPNDVVDL--KCRLLIITGANMGGKSTYIRSAATSLILMAQIGSFVPCSS  
Msh2\_Mg 617 -----GQGRITLREARHPCLEVQDD--VQFITNDVLEDSGSELIITGNMGGKSTYIROGVIALMAQIGCFVPCSE  
Msh2\_Nc 618 -----GTGRITLREARHPCMEVQDD--VQFITNDVLEDSGSELIITGNMGGKSTYIROGVIALMAQIGCFVPCSS  
Msh2\_Sc 647 -----SERRTHLISRRHPVLEMQDD--ISFISNDVTLSESGKDFLIITGNMGGKSTYIROVGVISLMAQIGCFVPCSE  
Msh2\_Dd 664 ----DENGAGTVIGGRHPCVEIQDN--VNFIANIDIDLHGGQSOHIIITGNMGGKSTFIROVGLIVLMAQIGCFVPAQK  
Msh2\_Tb 652 NVDNNSNGAILTIVNARHPLVLELRQP---AFTPNVTQLTNEAN-ALIIITGNMGGKSTFMRSVGCVALAQAGCFVPAQK  
Msh2\_Tc 668 -----EGNKSILTLNVRHPLVLELRQP---VYTPNLTLLHDDAN-ALIIITGNMGGKSTFMRSVGCVALAQAGCFVPAQK  
Msh2\_Pf 520 -----ENVIMRKSRRHPLLELQYN-LNNFIPNDIHMKNKNSRLIIVTGNMGGKSTYIROVATILMAQIGFVPCDF  
Msh2\_Py 554 -----KVLKLNKSRHPLVLENYLQIKNFIPNDIHMKNKNSRLIIVTGNMGGKSTYIROVATILMAQIGFVPCSTY  
Msh2\_Tt 512 -----KQINLVESRRHPLVLEMDN---NCVANDCFMNDKSRHIIITGNMGGKSTFIROVATCVLMAHIGCFVPCCKS  
PTMB\_344 497 -----KEILKESRRHPLLEAIDS---TCIVNDLEMDKSSRLHIIITGNMGGKSTYIROVATCVLMAHIGCFVPCCTT

Walker A/P-loop #####  
ATP-binding ## ###

ABC\_MSH2\_euk

Msh2\_At 697 ASISIRDCIFARVAGDCQLRGVSTFMQEMLETASILKASADKSLIIDEELGRGTSTYDGFGLAWAICEHIVQVKEAPT  
Msh2\_Zm 698 ASISVSDCIFARVAGDCQLHGVSTFMQEMLETASILKASADKSLIIDEELGRGTSTYDGFGLAWAICEHMEVTRAPT  
Msh2\_Hs 700 AEVSIYDCLLARVAGDSDLKGVSTFMAEMLETASILRSATKDSLIIIDEELGRGTSTYDGFGLAWAISEYIATKIGAFCM  
Msh2\_Dr 700 AELSVVDCVILARVAGDSDLKGVSTFMAEMLETASILRSATEDSLIIDEELGRGTSTYDGFGLAWAISEYIATRLKSFCL  
Msh2\_Dm 698 ATISMVDSLGRVAGSDNIIKGLSTFMVEMLETSGIIRIATDKSLIIDEELGRGTSTYEGCGIAWAIAEHIAKETKCFTL  
Msh2\_Ce 670 ATISVVDGIFTRVAGSDKQSGISTFMAEMLECSAIIQRATKNSFVVIDELGRGTSTEDGFLASAIQAIDLNRVQCLSH  
Msh2\_Mg 689 AELTIFDAILARVAGSDSQLKGVSTFMAEMLETANILKSATAESLIIDEELGRGTSTYDGFGLAWAISEHIVVETGCSAL  
Msh2\_Nc 690 AELTIFDAILARVAGSDSQLKGVSTFMAEMLETANILKSATAESLIIDEELGRGTSTYDGFGLAWAISEHIVVETGCFAL  
Msh2\_Sc 719 AELTAVDAILCRVAGDSDLKGVSTFMVEMLETASILKASAKNSLIIDEELGRGTSTYDGFGLAWAIAEHIASKIGCFAL  
Msh2\_Dd 738 AELTAVVDCILSRVAGDSDLKGVSTFMAEMLETASYILKVAATKNSLIIDEELGRGTSTYDGFGLAWAIAEYIYCNQIGGFCL  
Msh2\_Tb 728 ADIVVRDALMCRVAGATDHLAAGVSTFMVEMLESAAIINLSATQQILAIIVDELGRGTSTYDGFGLAWAIAQEVAVNAKSALL  
Msh2\_Tc 740 ADMVTRDAVMCRVAGATDHLAAGVSTFMVEMLESAAIINLSATRDSLAIVDELGRGTSTYDGFGLAWAIAQEVAVNAKSALL  
Msh2\_Pf 591 KEVPIFTQIMCRVAGSDFLKGLSTFISEMIEFAAIVKNADQNSLIIVDELGRGTSTYEGCGISWISIGKYILDNKKCFCL  
Msh2\_Py 626 AKTPIFSQIMCRVAGSDIQLKGLSTFFSEMIEVAIIVKNADSDLIIVDELGRGTSTYEGFGISWISVANYLNNIKCLCL  
Msh2\_Tt 581 GEMPIIDALITRVAGSDMQLRGLSTFMSEMLESANMLMATENSLIIDEELGRGTSTSEFGIAWAIAEHIANKIKYVCL  
PTMB\_344 566 AVVPIVIDAIIITRVAGSDVQTKGISTFMSEMLESASMLKAKPDSLIIIDEELGRGTSTSEFGIAWAIAEHIAKQIQSYCL

Q-loop/lid #### Walker B ##### H-loop/switch region #  
ABC transporter motif ##### D-loop ####  
ATP-binding # ATP-binding #

```

Msh2_At 777 FATHFHELTALAQANSEVSG--NTVGVANFHVSAHIDT-----ESRKLITMLYKVEPGA CDOSFGIHVAE
Msh2_Zm 778 FATHFHELTALAHRRNDEHQHISDIGVANYHVGAHIDP-----LSRKLITMLYKVEPGA CDOSFGIHVAE
Msh2_Hs 780 FATHFHELTALANQIP-----TVNNLHVITALT-----TEETITMLYQVKKGV CDOSFGIHVAE
Msh2_Dr 780 FATHFHELTALAQQVP-----TVRNLIHVITALT-----TDSTITMLYKVKKGV CDOSFGIHVAE
Msh2_Dm 778 FATHFHEITKLAETLS-----TVKNCHMAAVA-----DADDFITMLYQVRSQVMEKSFGLQVAR
Msh2_Ce 750 FATHFHEMGKLAEPQG-----AVAIQMGVQIEN-----NEIHMLYKVFEGVAQCSFGLQVAK
Msh2_Mg 769 FATHFHELTALAQHK-----QVNNLHVIAHISGTG-----DDAKADEKREVTLLYKVEPGI CDOSFGIHVAE
Msh2_Nc 770 FATHFHELTALADQYP-----NVKNLHVIAHISGTDTDITDVIDEDEKAKKKREVTLLYKVEPGI CDOSFGIHVAE
Msh2_Sc 799 FATHFHELTETLSKLP-----NVKNMHVVAHIEKNLK-----EQKHDDEDIITMLYKVEPGI SDOSFGIHVAE
Msh2_Dd 818 FATHFHELTILSDLLP-----MVKNLHVSAST-----QNNTFITMLYKVEQGP CDOSFGIHVAI
Msh2_Tb 808 FSTHFHEMTQLAARHTN-----VRNVHFGADVDT-----AARTIRFSYQIQPGPGRSYGLIYVAQ
Msh2_Tc 820 FSTHFHEMTQLAHHHTN-----VRNAHFGAEVNT-----VEGTRFSYRLEPGPGRSYGLIYVAQ
Msh2_Pf 671 FATHFHEMSNIAYQCEG-----VINRHVETITDKE-----KKKICFLYEIKDGASNKSYGMNVAE
Msh2_Py 706 FATHFHEISNLEDEHAA-----VSNHYVSAKIDEA-----KKKISFLYEIKKGFADKSYGVHVAQ
Msh2_Tt 661 FATHFHEITKMEQEVKG-----VINNYVSCVTID-----NKLITMQYKIKRGFAERSYGLIYVAE
PTMB.344 646 FATHFHEMTLMEHEITG-----VKNYVYSCVTEDE-----DKITMEYRVRYGAVDRSYGLIYVAQ

```

H-loop #####  
ATP-binding #

---

```

Msh2_At 839 FANFPESVVALAREKAAELEDFSPSSMIIN--NEESGKRKSREDDPDEVSRGAERAHKIKKEFAAIPPL-----DKMEL
Msh2_Zm 842 FANFPPEAVVALAKSKAAELEDFSTPTPTFSDDLKDEVGSKRRVFPSPDDITRGAARARLFTKEFAAIPM-----DEM DG
Msh2_Hs 833 LANFPKHVIECAKQKALELEEFQYIGESQGY----DIMEPAAKKCYLEREQGEKIQEFTSKVKQMPF-----TEMSE
Msh2_Dr 833 LAFPPKHVIANAREKALELEEFQDISSVG-----EEAGPKAKKRCMEKQEGERIIEAFIAKVKSMIPV-----DGMSD
Msh2_Dm 831 LANFPBHVQNAQEVYNEFEDEHVD-----KQKKEDKALLEKIQVAIQQLST-----AGNNV
Msh2_Ce 802 MVGIDENVINKAQLLEGLEKKLVID-----LGLQYSKDDVEQGSARIKELIVQWKEEVK-----AGDMSR
Msh2_Mg 832 LVRFPDKVVRMAKRKKADELEDFTTKHNNDN-----LGLQYSKDDVEQGSARIKELIVQWKEEVK-----AGDMSR
Msh2_Nc 841 LVRFPDKVVRMAKRKKADELEDFTSKHEEEN-----GGGLGVQYSKQDVEEGSALIKDVIVKWKDEVK-----SGRMSK
Msh2_Sc 861 VVQFPPEKIVKMAKRKANELDDLKTNNEDLK-----KAKLSLQEVNEGNIRIKALIKEWIRKVKKEEGLHDP SKITE
Msh2_Dd 871 LANFPFSQVTEAKQKAKLELSEFESNTLKQN-----HNKFLKEFKETNF-----NSNDV
Msh2_Tb 863 LAHIPDDVLD SARQKAVELEDFGGDETKNR-----AQALFSTATPEVVQRVTEYAKRIRI ELES-----GEGDG
Msh2_Tc 875 LANLPEEVVQS AKCKAAGLETFEQDEGQKR-----DYATISSASSEITERIAYYAKCIRGLND-----TKIAA
Msh2_Pf 726 IAKLPKVEVQKAYEKVELESAEN-----KYLLKEKLNIDT SASADENYKMKIISNYMKIKDEIHYIIFS-----STNE
Msh2_Py 761 IAKLPQKVVDKSFKSKLELSIEN-----KHYFKNLKNNDNNSIEYDKAKTEMHNKCEAYLKEITFK-----ANNE
Msh2_Tt 714 TLDFFPREITLHASNKLLELESYSGKISENQSSDQNFENFNKNSQTDDIFLLSKNSTIAQKEAVDLAS-----SYNE
PTMB.344 699 MLKFPKVEVLDKAKKALELETFEHNLESN-FIDEEVPIFN--NIDDELQYKVRNSTLQAKERVIKEAE-----KWKN

```

---

```

Msh2_At 910 KDSIQRVREMKDELEKDAAD--CHWLRQFL-----
Msh2_Zm 915 SKITLEMATKMKADLQKDAAD--NPWLQQFF-----
Msh2_Hs 902 ENITIKLQQLKAEVIAKNNSFVNEIISR---IKVTT--
Msh2_Dr 900 KAVKEELRKLKAEVISQNNFVNEIVSRSGKVKLSSA-
Msh2_Dm 883 DINVEDLTQLVTOFTKDI EQLDSDYFKS---VLATSEA
Msh2_Ce 831 KKEILESADIRQALLSLVK-----
Msh2_Mg 896 EEMVAKMKALVAADTKLLEN---PFFQS---IKAL---
Msh2_Nc 909 EEMVARLRELVLQKDERLLGN---PFFKS---VQAL---
Msh2_Sc 931 EASQHKIQBLLRANPEPEKENDNYLKY---IKALL-
Msh2_Dd 919 EKSISLVNSLLNKYSIDIN-----
Msh2_Tb 926 DSREAARRRLCSETEKEDALLSSLVEV-----
Msh2_Tc 938 GNEEASQR--LRLEIQDLSLISYLL-----
Msh2_Pf 793 NEFMERFVSKKNYIKELAI-----
Msh2_Py 828 QEFISLFEKKNKGFIVELFKNDNFNSI-----
Msh2_Tt 786 KIRNAASKEQKQILNLKQKII SALKS-----
PTMB.344 768 ELTNEKNPQKRKEIEKRKQIILKLIK-----

```

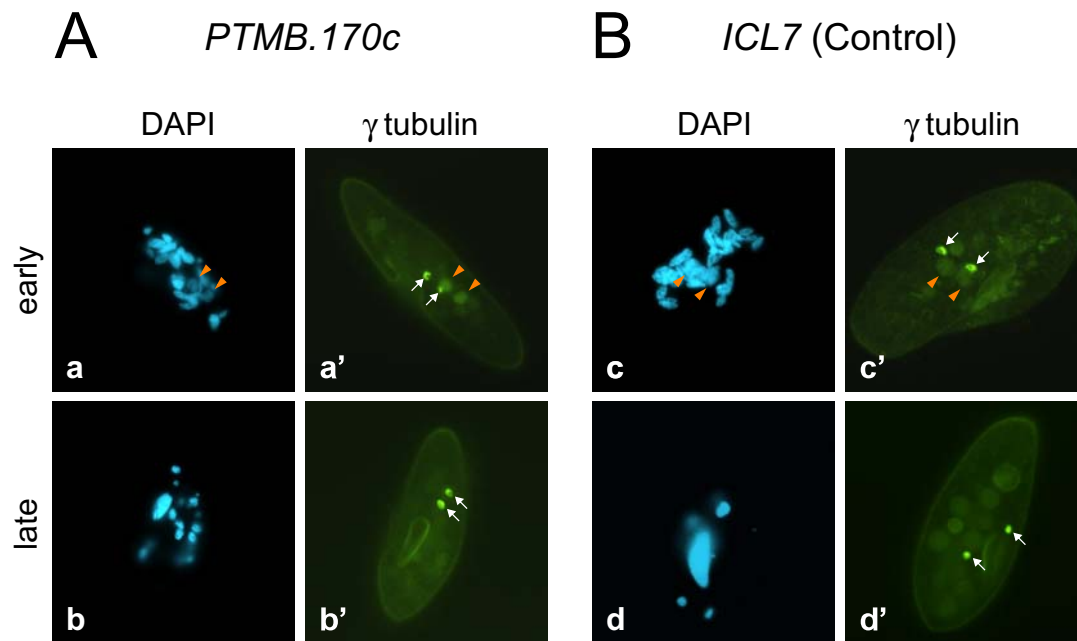

**Figure S8. Immunolabeling of *PTMB.170c*-silenced autogamous cells with anti- $\gamma$  tubulin antibodies**

**A.** Silencing of *PTMB.170c*.

**B.** Control silencing of the non-essential *ICL7* gene.

*Paramecium* 51 mt7 cells were grown for 10 vegetative divisions in the presence of bacteria overproducing dsRNA homologous to each target gene. During autogamy, fixed cells were labeled with anti- $\gamma$  tubulin antibody  $\gamma$ -4 to reveal MICs (panels a'-d') and early new MACs (12). DAPI was used to stain all nuclei (panels a-d).

Top panels (early): cells were fixed after the second division of the zygotic nucleus, when MAC development starts. At this stage, anti- $\gamma$  tubulin antibody labels new MICs (white arrows) and early new MACs (orange arrowheads). No significant difference can be seen between both silencing experiments.

Bottom panels (late): cells were isolated 24 hours later, after karyonidal division. Normally looking MICs are decorated with anti- $\gamma$  tubulin antibody. Developing MACs can only be detected by DAPI staining.

PTMB.220 38 Q-Q-----QEE--AQISQSTHLRKRV---IKPLTERERKALPIY  
 Ema1p\_Tt 112 F-DEEIQICISNTIVKEEIV-----VEE--DQNNNSNNRNKKVVFYEFNEPTISPEQEEELPVH  
 EHI\_090040\_Eh 53 L-QEKIQ-----G-M-SMRRS---NPISOKTRVSRNLPAP  
 DHX29\_Hs 503 Q-QQQQHS--EN-KRENSEDPEESWENLVSDDFSALESANVEDLEFVRLFRKIQS---TPKYOKILKERQOLPVF  
 DHX57\_Hs 488 PVIVNESYVNLK-KKISKR-----YDW---QAKSVHAEN-GKLCQKQFRMKQA---SQEFOFSLQERQSLPAW  
 RHA\_Hs 353 AFATPEQISMD-----P-----DK-----DHDLQATIIQEREILLPVK  
 TDRD9\_Hs 111 -----P-----SLAKLSS---VTCIPGTTYKYPDLPIS  
 CG1582\_Dm 418 R-NVEAQ-----TREN-RRLLQCFEVERK---EERYQKTIIDGRKQOLPAF  
 NIH\_At 179 FFKKPHMTKHD-----TEN--NVVSESSRLAKK---ERHFRTEFEARSKLPAHA

PTMB.220 70 NVSNKILEEMQNNNOVIVIIIGGTGCGKSTOVPOMTIRRHNTTEF-----ETPKTVNIICTOPRRILAAKSLAKRVAQELDCQ  
 Ema1p\_Tt 163 ENRLSILEETIKNNNVIVISGNTGCGKSTQPKFTACDD-----TSTKIIVTQPRRVAATAAIAERVSQELKSN  
 EHI\_090040\_Eh 83 QHRQETIEKIRONOVVVISGDTGCGKSTOVTOYIFEDARAN-----GEHVKIACQOPRRIAATSIAERVSEVGCSS  
 DHX29\_Hs 576 KHRDSIVETLKRHRVVVVAGETGSGKSTQVPHFLELDLILNEW-----EASKCNIVCTQPRRISAVSLANRVCDLQCE  
 DHX57\_Hs 548 EERETIILNLLRKHQVVVISGDTGCGKSTQVPOFILDLSLNGP-----PEKVNICTOPRRISAVISVAERVAKERAEER  
 RHA\_Hs 392 KFESEILEAISONSVVVIIRGATGCGKSTQVPOFILDLDLFIQND-----RAEACNIVVCTQPRRISAVSVAERVAERGERGE  
 TDRD9\_Hs 136 RYKEEVVSLIESNSVVIIRHGATGSGKSTQVPOFILDHYVQR-----SAYCSIVVCTQPRRISAVSVAERVAERVAERLDR  
 CG1582\_Dm 457 AETERILALIESSFVVVISGDTGCGKSTQVPOFILDNIFFRALQLPAKENLPVEIICQOPRRISAVSVAERVAERVAERLDR  
 NIH\_At 221 SERDAIIGAVESNOVVIIRGATGCGKSTQVPOFILDHMHWSK-----KEACKIICQOPRRISAVSVAERVAERVAERLDR

Motif I **GeTGTGKT** Motif Ia **XTQPRRXaAXX**  
 S S  
 ATP binding site #####

DEXH-box helicase domain

PTMB.220 145 LG----TLVGYQVGMDSQISSR-OTOIQFVTTGTFLOKLVHDER-EQVLKDYTHIIMDEVHERDIDIDFCIIILKLNLLKH  
 Ema1p\_Tt 230 LG----QRVGYQIQGDSNF-NR-NTQILYVTTGTFLOKLVHDER-DQFLREYTHIILDEVHERGIESDFGLIALKTFLLSQ  
 EHI\_090040\_Eh 154 LG----TAVGYQIGMEKQA-DS-NTNIIYLTPGVLLQQLMRR---EGRRMYTHIILDEAHERDLDTFCMLMLRKFLLSK  
 DHX29\_Hs 650 NPGGRNSLCGYQIRMESRA-CE-STRLLYCTTGVLRLKLEQED---GLSNVSHVIVDEVHERSVQSDFLILLKLEILQK  
 DHX57\_Hs 621 VG----LTVGYQIRLESVK-SS-ATRLLYCTTGVLRLKLEGP---TALQGVSHIIVDEVHERTESDFLLLVLDIVSQ  
 RHA\_Hs 465 PG----KSCGYSVRFESIL-PRPHASIMFCTVGVLLRKLKLE---AGTRGISHVIVDEVHERDINTDFLLVVLADYVQA  
 TDRD9\_Hs 207 LG----GVVGYQVGLKTA-TE-DTRLIYMTTGVLRLKLVSA---KSLMEFTHIILDEVHERTEEMDFLLLVVVKLLRT  
 CG1582\_Dm 537 IG----QLVGYQIRLENKV-SQ-STRLSFCTTGILLRLIASD---PLTGSVTHIIVDEVHERSESDFLILLKLNLLRE  
 NIH\_At 293 IG----RTVGYQVRLOSEG-GR-ESSVVECTNGILLRVLIGKGVNSSVPDITHIIVDEVHERDSYSDFLMLMLRDLLPS

Motif Ib **YXTdGXLLRe** Motif II **iXDEaHER**  
 Putative Mg++ binding site #####

PTMB.220 218 ---FP-ETKLILMSATICSDFKFNYSFKSKSLNIVDDLTYIQRVDRKYKFTDMTQENDVEISI-----KFEG  
 Ema1p\_Tt 302 HKNRN-SKLIIVMSATLNKDIIFLNYFSTTELNNLEKEIKEDQDCQEYFYDSSKFSEQLKITKQVILNELYTIFIIYQTKK  
 EHI\_090040\_Eh 224 ---T-TVRLIIMSAMMDVEKIQNHFMILIPETGYQMQ-----LQYLLCDF--  
 DHX29\_Hs 725 ---RS-DLHLILMSATVDSEKFSYFTH-----  
 DHX57\_Hs 691 ---RP-CLQVILMSATLNALFSDYFNS-----  
 RHA\_Hs 534 ---YP-EVRIVLMSATIDTSMFCBYFFN-----  
 TDRD9\_Hs 277 ---NSRFVQVVLMSATISCKEFADYFAVPVQNKV-----  
 CG1582\_Dm 607 ---RK-DLKVILMSATLNALFSDYFGG-----  
 NIH\_At 366 ---NP-RLRLILMSATLDAERFSEYFGG-----

Motif III **SAT**

PTMB.220 280 EEDHDISTQWGQPWKEIERQVQLTQEQRELEFQKQNELRELQGHFLDGDDEQAAPITIKVMSQKYPTEFYMEELHSYFND  
 Ema1p\_Tt 381 QQNQDDYSNWGQK----AHQTWNDQDDHDDTYEKMQRMICRFNCKYESNQKNYVEIQVQKRIQTVWLEDRKLTQ-K  
 EHI\_090040\_Eh 264 ---KEQKQFER-----IDITRLSKPPLHLHG-GKRPVVEEYIEDVILKLVKK  
 DHX29\_Hs 749 -----CPILRIS-GRSYPVEVFLLEDILLETGF  
 DHX57\_Hs 715 -----CPVITIE-GRTPVQDFLEDAHAVTRY  
 RHA\_Hs 558 -----CPITIEVY-GRTPVQDFLEDCIQMTEF  
 TDRD9\_Hs 308 -----NPAYIEFEVE-GKPHSVEEYVLDLEHIIHS  
 CG1582\_Dm 631 -----APVLDIEP-GRTEPVQDFLEDIEMSDF  
 NIH\_At 390 -----CPVVRVY-GFTYVVRTFFLDDAIVSVLNS

PTMB.220 360 ADTAKLETHQPL-----  
 Ema1p\_Tt 455 IC-----  
 EHI\_090040\_Eh 307 TFE--EY-PE-----  
 DHX29\_Hs 776 VLE--KDS-EYCQKFLDEEEV-----TINVTSKAC--GIKKY--  
 DHX57\_Hs 742 VIQ--DGS-EYMRSMKQISKERIKARRNRTAFEEVEDELRISLHLO--DQDSV--  
 RHA\_Hs 585 VPP--PKD-KKKDKDDGGEDDA-----NCNLTCC  
 TDRD9\_Hs 337 KL-----  
 CG1582\_Dm 658 VME--YDT-KYCRKLLKQEQEIL-----ERDIEYADVQA--SGEAP--  
 NIH\_At 417 DKNS-HLIS-AVKRDFKDEDKVSIDEAID-LAWTNDVDFCLVLDLMSSEGSHEAYNYQNSTGLTPLMVFAGKGRVSDVCK

```

PTMB.220      372 -----RFQTSLSYFOITPKVQQDSVQAMIQLELEFLD
Ema1p Tt      457 -----NKNYFNARKPELNEIYKIVAKETKRVQ
EHI_090040 Eh  315 -----QOKENIFSTLYPEIDSRTLGLGVDLIQYTI
DHX29 Hs      809 -----QEYTFVOTGAHADINPFY-----QKYSRRTCHALYLMNPHKTNIDL---ILELLAYLD
DHX57 Hs      790 -----KDAVDPDQLDFKQILARY-----KGVSKSVIKTMSIMDFEKVLEL---TEALLEWTV
RHA Hs        614 -----DEYGEF-----TRLMSQNEKETPFEL---TEALLKYTF
TDRD9 Hs      339 -----SPHLLHEEIVTKDIYEVAVSLIQMFD
CG1582 Dm     694 -----GKKIKDEKLTLAETYQRY-----AEYSKPTOKSYLMEPMTINPEL---TESVLKYYTV
NIH At        494 LLSVGADCTLKSKEGITALELAEKENQFETAQITREHAGNIQNSQQAQDLLDKVMATIKPEEVDVGL---IVKLMKKKIC
    
```

```

PTMB.220      402 SNKI-----KDTIGMCGAGAILIFLPGYQETMDIREIY-----OKFG---EERFIIII LHSVTVIIPKE--
Ema1p Tt      485 FQE-----EPMLRSYKKGDIILVFLPGYNEIVKLSILDQIMMEFKQTNQSIYN---QNKYKLIELHSLGIDINTKE
EHI_090040 Eh  345 R-----NETAFICILVFLPGMAEIEEMKSRLEC-----CSYRG---EIPCNFIKLSHSTVSMTEQRS
DHX29 Hs      859 KS-----PQFRNIEGAILIFLPGLAITQQLYDLSN-----DRRFY---SERKVIALLSHSILSTQDOAA
DHX57 Hs      840 DG-----KHS-YPPGAILVFLPGLAEIKMLYEQLOS-----NSLFNRRSRNRCVIHPLHSLSSSEEQQA
RHA Hs        646 T-----LNVPGAILVFLPGWNLTYTMQKHLEM-----NPHFG---SHRQIPLHSLQIPREQRK
TDRD9 Hs      365 DDMKESGNKAWSGAQFVLERSSVLVFLPGLGEINYMHELLTS-----LV---HKRLQVYPLHSSVALEEQNN
CG1582 Dm     744 EG-----SHDWPREGTTILIFLPGFGETQSVHDSILD-----NALFSP---RAGKFIIVPLHSALSGETDAL
NIH At        571 S-----DSKDGAILVFLPGWEIISKTRKELLD-----DRFEA---HSAKEFIILCLHSRVPAAEQRK
    
```

**Motif IV LvFLXG**  
 Nucleotide binding region #### ##  
 Helicase superfamily C-terminal domain

```

PTMB.220      458 FDETHKRKRRIILSTNVAESSITVPCREVIDFCLTKETIYNPKNLTEKLALQWCSKASADQRKGRTRIFPGTCFRLI
Ema1p Tt      553 LFGRN-QDYTKIILATNIAESSITIPNCFVVFDFCLTKETINYNPSSGLEKLELOWASKASITQRAGRTGRNCNGVNIIRLV
EHI_090040 Eh  398 IFDES--NAHKIILSSNIAESSITVPGVKVINFGMEKSMQEDTAMNIEALKLWISSASETORVGRAGRISSEKCYHMV
DHX29 Hs      915 AFTLPPPGVRKIVLATNIAETGITIPDVVEVIDTGRTKENKYHSSQMSLVEITVSKASALQRQCRAGRVRDGEFCFRMY
DHX57 Hs      898 VFVKPPAGVTKIILSTNIAETSITIDDVVYVIDSGMKKEKRYDASKGMESLEDTFVSOANALQRKGRAGRVASGVCFHLE
RHA Hs        698 VEDPVPVGVTKIILSTNIAETSITINDVVYVIDSCKQKVKLFTAHNNMNYATVWASKNLEQRKGRAGRVRPGEFCFHLC
TDRD9 Hs      430 VFTSEVPGYRKIILSTNIAESSITVDEYKYVIDFCLTRTLVCEEDTNYQSLRLSWASKTSCNQRRKGRAGRVRGVCYRLV
CG1582 Dm     802 VFKRAPPGRKIVLATNIAETSITIDDVVYVIDSGRMKEKSYDNRNMESLDLVWVSRANAKQRKGRAGRVMGVCIHLY
NIH At        624 VNNRPPRGCRKIVLATNIAESAVIDIDDVVYVIDSGRMKEKSYDNYVDSILQSSWVSKANAKQRRAGRAGCQAGICVHLY
    
```

**Motif V TNIAETSXTiXg** **Motif VI axQRXGRAGRXX**  
 Nucleotide binding region ### # # #  
 ATP-binding site #

```

PTMB.220      537 PQTIFKNEKMTQYSVCEMLRCPLETIIILRLKKLYQLSMNE-----
Ema1p Tt      632 PRQFFMAEIKDYQTPPEILRCPIEKVILKIKILDEGESYQKIHLSDDDDVEQNNLIEEIIKEKQSEKSKKKRLNFSTDFD
EHI_090040 Eh  476 PRTF-ARELGRYSEPEIQRSPLKIMLMILEMKE-----
DHX29 Hs      995 TERRFE-GFMDYSVPEILRVPLEELCLHMKCNLGSPE-----
DHX57 Hs      978 TSHHYNHQLLKQQLPEIQRVPLEQLCLRIKILEMFSAH-----
RHA Hs        778 SRARFE-RIETHMTPEMERTPLHEIALSKLLRLGG-----
TDRD9 Hs      510 HKDFWNSIPDHVVPPEMLRCPLGSTILKVKLLDMGEP-----
CG1582 Dm     882 TSYRYQYHIIAQVPPEIQRVPLEQIVLRIKTLQTFASR-----
NIH At        704 SKILRAA-SLPEYRVPEVMRMPVDELCLQWKMLDPCN-----
    
```

```

PTMB.220      577 -----NKTEKLELNTIVDLKQVFNDRSRTLKTALDPPSTKQIENASNLQMGALS
Ema1p Tt      712 DIDYMKQFDTKPVFDGQDTAFLIAGPITKNKSKKQOLENSQNL-RLFEDPVRVLOFAIEAPDDYSICQSMENLMSVGALEK
EHI_090040 Eh  509 VKENR-----IDNAITLAPLGRFAVKLPIDYRVAKLVEFGLYFGVFTETARIAALFGINQOT-LRRET---SEM---
DHX29 Hs      1032 -----DFLSKALDPPQLQVSNANLRLKRTGACE-----
DHX57 Hs      1016 -----NLQSVFSRLIEPPHTDSLRASKRLRLDGLALT-----
RHA Hs        813 -----IGQFLAKAIEPPPLDAMIEAHTLRELDALD-----
TDRD9 Hs      547 -----RALIATAISPPGLSDIERTIILLKEVGALA-----
CG1582 Dm     920 -----NTLSVLELTELAPTEDSVLCAITRLRDVGALD-----
NIH At        739 -----NVNDFLOKLMDEPPVAOSIENALIIILKDI GALT-----
    
```

```

PTMB.220      628 YPNS-----QDSTIHTRLGQMGDMPIDIFITRFIMYCNIIGCAYEGVTIAAII LSORKNYFTHHFMISQ----KL--
Ema1p Tt      791 LKKIQYTDTOKEKIKVVKLGRFYNDMPCDLKLAKFICFGYTFDCLIECTIASIYSORKS-FNPNFYKISGNLQKIDQ
EHI_090040 Eh  539 VKENR-----IDNAITLAPLGRFAVKLPIDYRVAKLVEFGLYFGVFTETARIAALFGINQOT-LRRET---SEM---
DHX29 Hs      1061 LN-----EPKLTPLGCHLAALPVNVKIGKMLIFGATFGCLDPVATLAAMVTEKSP-FTTPIGR---KDEAD-
DHX57 Hs      1048 P-----DERLTPPLGYHLASLPVDVIRGKLMIFGSIERCLDPALTTAASLAFKSP-FVSPWDK---KEEAN-
RHA Hs        844 A-----NDELTPLGRILAKLPEPRFGKMMIMGCIYVVGDAICTIAAATCFPEP-FINE---GK---RLG-
TDRD9 Hs      577 VSGQR-EDE--NPHDGETLFLGRVLAQLPVNQGLKLIVLGHVFGCLDECLIIAAALS LKNF-FAMPFRQ---ILDGY-
CG1582 Dm     952 A-----EDQLTPLGCHLAALPVNVIRGKLMLYGATFGCLDSVLTIAACLSNKSP-FVSPPLNK---RTEAD-
NIH At        771 P-----EEELTELQKFGQLPVHPRISKVIYFAI-VNCLDPALIIACAADKDE-FTMPLSPGD---RKKAA-
    
```

Helicase associated domain HA2

```

PTMB.220      695  F FNSLYLYDKGNEDDLLIQLRVYQEWEIFFFNI-LKSTITQH-----DLKRE-----
Emalp_Tt      870  F TDLIFRWDQGEESDMLELKIQEWENEFFQS-QLEFIKLRKESKMQRQIRQEQNSEQNDFLSLDQSI PKILSEEQLKLP
EHI_090040_Eh 603  L-QKKMVI-DKLYSDIITSL-----
DHX29 Hs      1123 LAKSA--LAM-ADSDHLITTYNAMLGWKKRQEGGYR-----
DHX57 Hs      1109 QKKLE--FAF-ANSDY LALLQAMKQWQLSTKEG-VR-----
RHA Hs         902  YIHRN--FAGNRFS DHVALLSVFQAWDDARMGC-EE-----
TDRD9 Hs      648  RNKVN--ESGSSKSDCLALVEAKTKWACRQTCELR-----
CG1582_Dm     1013 KCKRM--FAL-ANSDHLITVLNARKWLDVARRGNYA-----
NIH_At        834  AAKHELASLYGDHSDHLATVAATQCWKNAKASC-QA-----

```



| Gene                                  | Coordinates of hybridization probe | Coordinates of silencing insert |
|---------------------------------------|------------------------------------|---------------------------------|
| Cluster I - early induction peak      |                                    |                                 |
| PTMB.08c                              | 29612 ... 30529                    | 30580 ... 31351                 |
| PTMB.96                               | nt                                 | 208991 ... 209866               |
| PTMB.104                              | nt                                 | 220433 ... 221343               |
| PTMB.157c                             | nt                                 | 334832 ... 336442               |
| PTMB.170c                             | 367695 ... 368605                  | 365562 ... 366800               |
| PTMB.182                              | nt                                 | 401645 ... 403784               |
| PTMB.186c                             | 414934 ... 415237                  | 414934 ... 415237               |
| PTMB.220                              | 485312 ... 486442                  | 483829 ... 484842               |
| PTMB.236c                             | nt                                 | 521796 ... 523272               |
| PTMB.238c                             | nt                                 | 529894 ... 532410               |
| PTMB.239c                             | nt                                 | 532496 ... 533275               |
| PTMB.285c                             | 609853 ... 610264                  | 610922 ... 612118               |
| PTMB.422c                             | 873575 ... 874983                  | 876703 ... 878481               |
| PTMB.344c                             | 693077 ... 693866                  | 694411 ... 695111               |
| Cluster II - late induction peak      |                                    |                                 |
| PTMB.169c                             | 362850 ... 363407                  | nt                              |
| PTMB.219                              | 481729 ... 482273                  | nt                              |
| PTMB.443c                             | 932116 ... 932675                  | 931872 ... 932705               |
| Cluster III - gradually induced genes |                                    |                                 |
| PTMB.10c                              | 36175 ... 36761                    | nt                              |
| PTMB.143c                             | 316219 ... 316717                  | nt                              |
| Cluster IV - repressed genes          |                                    |                                 |
| PTMB.142c                             | 314022 ... 314891                  | nt                              |
| PTMB.176c                             | 388926 ... 389542                  | nt                              |
| PTMB.400c                             | 798492 ... 799038                  | nt                              |

All coordinates refer to Megabase chromosome (Acc. No. CR548612).

nt – not tested

Table S11. Ohnologs and other paralogs of silenced genes.

| Gene      | Ohnologs from WGD         |                 |                                                     |             |                                                                                               |                      | Other proteins with AA identity >40%                                                                                                  |                            |             |
|-----------|---------------------------|-----------------|-----------------------------------------------------|-------------|-----------------------------------------------------------------------------------------------|----------------------|---------------------------------------------------------------------------------------------------------------------------------------|----------------------------|-------------|
|           | recent WGD                |                 | intermediary WGD                                    |             | old WGD                                                                                       |                      | Co-silenced                                                                                                                           | Acc. number (AA identity)  | Co-silenced |
|           | Acc. number (AA identity) | Co-silenced*    | Acc. number (AA identity)                           | Co-silenced | Acc. number (AA identity)                                                                     | Co-silenced          |                                                                                                                                       |                            |             |
| PTMB.08c  | -                         | -               | -                                                   | -           | -                                                                                             | -                    | -                                                                                                                                     | -                          | -           |
| PTMB.96   | GSPATG00003747001 (94%)   | Yes (11; 363nt) | -                                                   | -           | -                                                                                             | -                    | GSPATG000027670001 (54%)<br>GSPATG000032765001 (54%)                                                                                  | No<br>No                   |             |
| PTMB.104  | GSPATG00003737001 (31%)   | No              | -                                                   | -           | -                                                                                             | -                    | -                                                                                                                                     | -                          |             |
| PTMB.157c | -                         | -               | -                                                   | -           | -                                                                                             | -                    | GSPATG00003686001 (54%)<br>GSPATG00005648001 (50%)<br>GSPATG00011788001 (50%)<br>GSPATG000024302001 (46%)<br>GSPATG000008096001 (46%) | No<br>No<br>No<br>No<br>No |             |
| PTMB.170c | -                         | -               | GSPATG00000774001 (52%)<br>GSPATG000008594001 (51%) | No<br>No    | GSPATG000008008001 (30%)                                                                      | No                   | -                                                                                                                                     | No                         |             |
| PTMB.182  | GSPATG00003662001 (91%)   | Yes (18; 547nt) | -                                                   | No          | GSPATG00005730001 **<br>GSPATG00007856001 **<br>GSPATG00008012001 **<br>GSPATG000035986001 ** | No<br>No<br>No<br>No | -                                                                                                                                     | No<br>No<br>No<br>No       |             |
| PTMB.186c | PTETG800015001 (98%)      | Yes (4; 149nt)  | -                                                   | -           | -                                                                                             | -                    | GSPATG00005766001 (97%)<br>GSPATG00007882001 (97%)<br>GSPATG00004184001 (89%)<br>GSPATG00010146001 (89%)<br>GSPATG000024666001 (88%)  | No***<br>No***<br>No<br>No |             |
| PTMB.220  | GSPATG00003619001 (93%)   | Yes (6; 193nt)  | -                                                   | -           | -                                                                                             | -                    | -                                                                                                                                     | -                          |             |
| PTMB.236c | GSPATG00003603001 (79%)   | Yes (9; 274nt)  | GSPATG00008659001 (62%)<br>GSPATP000000836001 (59%) | No          | -                                                                                             | -                    | -                                                                                                                                     | -                          |             |
| PTMB.238c | GSPATG00003600001 (73%)   | Yes (10; 294nt) | -                                                   | -           | -                                                                                             | -                    | -                                                                                                                                     | -                          |             |
| PTMB.239c | -                         | -               | -                                                   | -           | -                                                                                             | -                    | -                                                                                                                                     | -                          |             |
| PTMB.285c | GSPATG00003553001 (93%)   | Yes (3; 100nt)  | GSPATG00000904001 (65%)                             | No          | -                                                                                             | -                    | -                                                                                                                                     | -                          |             |

|           |                          |                 |   |   |   |                                                                               |    |
|-----------|--------------------------|-----------------|---|---|---|-------------------------------------------------------------------------------|----|
| PTMB.422c | GSPATG00003412001 (9.6%) | Yes (15; 590nt) | - | - | - | GSPATG00012059001 (40%)<br>GSPATG00013523001 (40%)<br>GSPATG00015493001 (39%) | No |
| PTMB.344c | -                        | -               | - | - | - | -                                                                             | -  |
| PTMB.443c | -                        | -               | - | - | - | GSPATG00034046001 (49%)<br>GSPATG00037262001 (48%)                            | No |

\* between parenthesis: identical stretches  $\geq 23$ nt (= Paramecium siRNA length) within RNAi insert and total length covered by identical stretches. Comparison of silencing inserts with paralogous genes was done using Smith-Waterman alignment tool (<http://paramecium.cgm.cnrs-gif.fr/cgi-bin/other/alignmen>)

\*\* conserved domains only

\*\*\* GSPATG00005766001 and GSPATG00007882001 each share one identical  $\geq 23$ nt stretch with PTMB.186c silencing insert covering 23 and 29nt, respectively.

## SUPPLEMENTARY REFERENCES

1. **Arnaiz, O., S. Cain, J. Cohen, and L. Sperling.** 2007. ParameciumDB: a community resource that integrates the *Paramecium tetraurelia* genome sequence with genetic data. *Nucleic Acids Res* **35**:D439-444 Epub 2006 Nov 2016.
2. **Aury, J. M., O. Jaillon, L. Duret, B. Noel, C. Jubin, B. M. Porcel, B. Segurens, V. Daubin, V. Anthouard, N. Aiach, O. Arnaiz, A. Billaut, J. Beisson, I. Blanc, K. Bouhouche, F. Camara, S. Duharcourt, R. Guigo, D. Gogendeau, M. Katinka, A. M. Keller, R. Kissmehl, C. Klotz, F. Koll, A. Le Mouel, G. Lepere, S. Malinsky, M. Nowacki, J. K. Nowak, H. Plattner, J. Poulain, F. Ruiz, V. Serrano, M. Zagulski, P. Dessen, M. Betermier, J. Weissenbach, C. Scarpelli, V. Schachter, L. Sperling, E. Meyer, J. Cohen, and P. Wincker.** 2006. Global trends of whole-genome duplications revealed by the ciliate *Paramecium tetraurelia*. *Nature*. **444**:171-178.
3. **Benjamini, Y., and Y. Hochberg.** 1995. Controlling the false discovery rate: a practical and powerful approach to multiple testing. *J Royal Stat Soc Ser B* **57**:289–300.
4. **Bétermier, M., S. Duharcourt, H. Seitz, and E. Meyer.** 2000. Timing of developmentally programmed excision and circularization of *Paramecium* internal eliminated sequences. *Mol. Cell. Biol.* **20**:1553-1561.
5. **Bolstad, B. M., R. A. Irizarry, M. Astrand, and T. P. Speed.** 2003. A comparison of normalization methods for high density oligonucleotide array data based on variance and bias. *Bioinformatics* **19**:185-193.
6. **Bourne, Y., M. H. Watson, M. J. Hickey, W. Holmes, W. Rocque, S. I. Reed, and J. A. Tainer.** 1996. Crystal structure and mutational analysis of the human CDK2 kinase complex with cell cycle-regulatory protein CksHs1. *Cell*. **84**:863-874.
7. **Chenna, R., H. Sugawara, T. Koike, R. Lopez, T. J. Gibson, D. G. Higgins, and J. D. Thompson.** 2003. Multiple sequence alignment with the Clustal series of programs. *Nucleic Acids Res* **31**:3497-3500.
8. **Garnier, O., V. Serrano, S. Duharcourt, and E. Meyer.** 2004. RNA-mediated programming of developmental genome rearrangements in *Paramecium tetraurelia*. *Mol. Cell. Biol.* **24**:7370-7379.
9. **Gogendeau, D., C. Klotz, O. Arnaiz, A. Malinowska, M. Dadlez, N. G. de Loubresse, F. Ruiz, F. Koll, and J. Beisson.** 2008. Functional diversification of centrioles and cell morphological complexity. *J Cell Sci.* **121**:65-74.
10. **Gratias, A., G. Lepere, O. Garnier, S. Rosa, S. Duharcourt, S. Malinsky, E. Meyer, and M. Betermier.** 2008. Developmentally programmed DNA splicing in *Paramecium* reveals short-distance crosstalk between DNA cleavage sites. *Nucleic Acids Res* **36**:3244-3251.
11. **Hartigan, J. A., and M. A. Wong.** 1979. A K-means clustering algorithm. *Applied Statistics* **28**:100-108.
12. **Klotz, C., F. Ruiz, N. Garreau de Loubresse, M. Wright, P. Dupuis-Williams, and J. Beisson.** 2003. Gamma-tubulin and MTOCs in *Paramecium*. *Protist* **154**:193-209.
13. **Lamers, M. H., A. Perrakis, J. H. Enzlin, H. H. Winterwerp, N. de Wind, and T. K. Sixma.** 2000. The crystal structure of DNA mismatch repair protein MutS binding to a G x T mismatch. *Nature* **407**:711-717.
14. **Larkin, M. A., G. Blackshields, N. P. Brown, R. Chenna, P. A. McGettigan, H. McWilliam, F. Valentin, I. M. Wallace, A. Wilm, R. Lopez, J. D. Thompson, T. J. Gibson, and D. G. Higgins.** 2007. Clustal W and Clustal X version 2.0. *Bioinformatics* **23**:2947-2948.
15. **Lewis, S. E., S. M. Searle, N. Harris, M. Gibson, V. Lyer, J. Richter, C. Wiel, L. Bayraktaroglu, E. Birney, M. A. Crosby, J. S. Kaminker, B. B. Matthews, S. E.**

- Prochnik, C. D. Smithy, J. L. Tupy, G. M. Rubin, S. Misra, C. J. Mungall, and M. E. Clamp.** 2002. Apollo: a sequence annotation editor. *Genome Biol* **3**:RESEARCH0082 Epub 2002 Dec 0023.
16. **Marisa, L., J. L. Ichante, N. Reymond, L. Aggerbeck, H. Delacroix, and M. H. Mucchielli-Giorgi.** 2007. MAnGO: an interactive R-based tool for two-colour microarray analysis. *Bioinformatics* **23**:2339-2341 Epub 2007 Jun 2322.
17. **Notredame, C., D. G. Higgins, and J. Heringa.** 2000. T-Coffee: A novel method for fast and accurate multiple sequence alignment. *J Mol Biol* **302**:205-217.
18. **Nowacki, M., W. Zagorski-Ostojka, and E. Meyer.** 2005. Nowa1p and Nowa2p: novel putative RNA binding proteins involved in *trans*-nuclear crosstalk in *Paramecium tetraurelia*. *Curr Biol*. **15**:1616-1628.
19. **Praefcke, G. J., and H. T. McMahon.** 2004. The dynamin superfamily: universal membrane tubulation and fission molecules? *Nat Rev Mol Cell Biol*. **5**:133-147.
20. **Prakash, B., L. Renault, G. J. Praefcke, C. Herrmann, and A. Wittinghofer.** 2000. Triphosphate structure of guanylate-binding protein 1 and implications for nucleotide binding and GTPase mechanism. *EMBO J*. **19**:4555-4564.
21. **Rickman, D. S., C. J. Herbert, and L. P. Aggerbeck.** 2003. Optimizing spotting solutions for increased reproducibility of cDNA microarrays. *Nucleic Acids Res* **31**:e109.
22. **Smyth, G. K.** 2004. Linear models and empirical bayes methods for assessing differential expression in microarray experiments. *Stat Appl Genet Mol Biol* **3**:Article3.
23. **Smyth, G. K., and T. Speed.** 2003. Normalization of cDNA microarray data. *Methods* **31**:265-273.
24. **Tanner, N. K., and P. Linder.** 2001. DExD/H box RNA helicases: from generic motors to specific dissociation functions. *Mol Cell* **8**:251-262.
25. **Theis, K., P. J. Chen, M. Skorvaga, B. Van Houten, and C. Kisker.** 1999. Crystal structure of UvrB, a DNA helicase adapted for nucleotide excision repair. *Embo J* **18**:6899-6907.
26. **Timmons, L., and A. Fire.** 1998. Specific interference by ingested dsRNA. *Nature* **395**:854.
27. **Zagulski, M., J. K. Nowak, A. Le Mouel, M. Nowacki, A. Migdalski, R. Gromadka, B. Noel, I. Blanc, P. Dessen, P. Wincker, A. M. Keller, J. Cohen, E. Meyer, and L. Sperling.** 2004. High coding density on the largest *Paramecium tetraurelia* somatic chromosome. *Curr Biol* **14**:1397-1404.
